# Supplementary material for: Amplified Genes May Be Overexpressed, Unchanged, or Downregulated in Cervical Cancer Cell Lines
Source: PLoS One. 2012 Mar 7;7(3):e32667. doi: 10.1371/journal.pone.0032667 (PMC3296745; doi:10.1371/journal.pone.0032667)
Supplement: Table S2 — Comparison between copy number and genes expression by cytoband. a. Chi square test. b. Z test. c. Include cytobands with more than 5.8% of altered SNPs and p-value<0.05 (chi square) compared with the whole genome. The cytobands shadowed in blue were those with more than 30% of CN altered SNPs. d. Include cytobands with more than 15.1% of deregulated genes and p-value<0.05 (chi square) compared with the whole genome or Z score >1.96 or <−1.96. Z score was calculated as part of the Parametric Gene Set Enrichment Analysis. (XLSX) [file pone.0032667.s004.xlsx]

## Sheet: Table TS-2
	Table supplementary S2. Comparison between copy number and genes expression by cytoband
			SNPs analysis				Gene expression analysis
	CHR	CYTOBAND	CN status	CN-recurrent SNPs % (positive/explored)	p-valuea		% Down	% Up	Total deregulated % (positive/explored)	p-valuea	Z score	p-valueb
	A. Cytobands with greater CN-alterations than the whole genome.c
	1	1p21	3	17.2 (104/606)	1.56552e-30		24.3902	0	24.4 (10/41)	>0.05	-2.28303	0.0224247
	1	1q23	3	22.6 (114/505)	1.2446e-55		12.766	2.12766	14.9 (21/141)	>0.05	-1.66547	>0.05
	1	1q31	3	30.9 (225/727)	2.69231e-181		10.8108	0	10.8 (4/37)	>0.05	-1.35088	>0.05
	1	1q32	3	10.4 (56/538)	0.00013625		6.41026	11.5385	17.9 (28/156)	>0.05	3.37353	0.000741919
	1	1q41	3	25.4 (153/602)	5.74988e-91		5.40541	5.40541	10.8 (4/37)	>0.05	0.917792	>0.05
	1	1q42	3	23 (110/478)	1.93958e-55		2.9703	12.8713	15.8 (16/101)	>0.05	0.834601	>0.05
	2	2p25	1	12.7 (62/487)	3.74372e-09		13.1148	0	13.1 (8/61)	>0.05	-1.92691	>0.05
	3	3p26	1	25.3 (204/807)	1.46153e-120		12.5	0	12.5 (2/16)	>0.05	-1.02032	>0.05
	3	3p11	Combined	14.5 (10/69)	0.0246135		14.2857	0	14.3 (1/7)	>0.05	-0.689975	>0.05
	3	3q11	3	19.3 (21/109)	8.61655e-08		4.34783	0	4.3 (1/23)	>0.05	-0.528179	>0.05
	3	3q24	3	42.3 (134/317)	8.23837e-166		13.3333	0	13.3 (2/15)	>0.05	-1.09367	>0.05
	3	3q26	3	38.7 (322/831)	0		10.9589	4.10959	15.1 (11/73)	>0.05	-0.174982	>0.05
	4	4p16	1	46.6 (117/251)	2.34007e-164		9.73451	5.30973	15 (17/113)	>0.05	-0.727662	>0.05
	4	4p15	1	8.1 (100/1229)	0.00788908		18	4	22 (11/50)	>0.05	-0.866401	>0.05
	5	5p15	3	97.2 (890/916)	0		1.40845	43.662	45.1 (32/71)b	7.2e-11	5.53492	3.11144e-08
	5	5p14	3	82.2 (287/349)	0		0	0	0 (0/8)	>0.05
	5	5p13	3	95.1 (685/720)	0		8.47458	13.5593	22 (13/59)	>0.05	1.15326	>0.05
	5	5p12	3	100 (59/59)	7.9274e-206		17.6471	23.5294	41.2 (7/17)c	0.0282328	1.23995	>0.05
	6	6q23	1	10.7 (44/412)	0.000541241		18.1818	1.81818	20 (11/55)	>0.05	-1.70239	>0.05
	6	6q25	1	10 (57/568)	0.000397442		10.8108	5.40541	16.2 (12/74)	>0.05	-0.878831	>0.05
	7	7p11	3	49.2 (62/126)	4.33967e-93		0	14.2857	14.3 (3/21)	>0.05	0.711797	>0.05
	7	7q32	3	34.3 (58/169)	8.99453e-54		3.7037	14.8148	18.5 (10/54)	>0.05	0.656967	>0.05
	7	7q34	3	14.8 (22/149)	8.00637e-05		8.62069	3.44828	12.1 (7/58)	>0.05	-0.849105	>0.05
	8	8p23	1	8.5 (68/804)	0.0181914		12.5	0	12.5 (13/104)	>0.05	-2.13414	0.0328264
	8	8p12	1	16.3 (63/387)	1.47484e-16		9.52381	4.7619	14.3 (6/42)	>0.05	-0.436743	>0.05
	11	11q14	3	9.3 (95/1022)	5.62058e-05		7.14286	1.78571	8.9 (5/56)	>0.05	-0.646286	>0.05
	11	11q22	3	21.2 (163/768)	1.02165e-71		12.069	1.72414	13.8 (8/58)	>0.05	-1.30729	>0.05
	11	11q23	1	32.1 (135/420)	1.70796e-114		9.6	4	13.6 (17/125)	>0.05	-1.02188	>0.05
	11	11q24	1	15.9 (44/277)	5.24785e-11		4	1	5 (5/100)	0.0472466	-0.606415	>0.05
	11	11q25	1	41.9 (36/86)	1.01768e-43		7.14286	7.14286	14.3 (2/14)	>0.05	0.26675	>0.05
	12	12q12	3	16.1 (70/435)	5.96827e-18		22.2222	3.7037	25.9 (7/27)	>0.05	-1.29782	>0.05
	13	13q12	1	88.6 (565/638)	0		12.987	3.8961	16.9 (13/77)	>0.05	-1.22621	>0.05
	13	13q14	1	38.8 (233/600)	2.83411e-258		17.2043	0	17.2 (16/93)	>0.05	-2.60747	0.00911943
	16	16p12	1	12.2 (27/222)	0.0010662		6.89655	6.89655	13.8 (12/87)	>0.05	1.31103	>0.05
	17	17q25	3	13.1 (13/99)	0.0227066		1.54639	17.5258	19.1 (37/194)	>0.05	2.13967	0.0323776
	18	18q11	1	33.7 (66/196)	1.3443e-59		9.375	3.125	12.5 (4/32)	>0.05	-0.738052	>0.05
	18	18q21	1	19.1 (169/883)	1.19194e-61		11.7021	8.51064	20.2 (19/94)	>0.05	-0.727094	>0.05
	18	18q22	1	18.5 (131/707)	8.00044e-45		20.8333	0	20.8 (5/24)	>0.05	-1.30532	>0.05
	18	18q23	1	19.5 (29/149)	6.97034e-11		12.5	18.75	31.3 (5/16)	>0.05	-0.450366	>0.05
	20	20p12	1	22.5 (171/760)	2.87351e-83		13.0435	2.17391	15.2 (7/46)	>0.05	-1.3341	>0.05
	21	21p11	1	100 (5/5)	2.33934e-17		0	0	0 (0/3)	>0.05
	X	Xq13	1	16.4 (9/55)	0.0113873		3.1746	7.93651	11.1 (7/63)	>0.05	1.74486	>0.05
	X	Xq26	1	28.2 (35/124)	2.49504e-24		5.08475	1.69492	6.8 (4/59)	>0.05	-0.622867	>0.05
	X	Xq27	1	18.5 (44/238)	6.12326e-15		2.85714	0	2.9 (1/35)	>0.05	-0.786899	>0.05
	X	Xq28	1	25.7 (28/109)	7.9845e-17		5.69106	3.25203	8.9 (11/123)	>0.05	2.59958	0.00933219
	B. Cytobands with non or low CN-altered SNPs but with an enrichment of deregulated genes.
	1	1p34	2	0			1.72414	8.04598	9.8 (17/174)	P>0.05	4.17723	2.94952e-05
	1	1q21	3	6.7 (14/209)	P>0.05		11.3043	10.8696	22.2 (51/230)	0.026443	-0.671422	>0.05
	2	2p11	2	0			18.6441	1.69492	20.3 (12/59)	P>0.05	-2.10873	0.0349632
	2	2q32	2	0			25.5814	0	25.6 (11/43)	P>0.05	-2.38036	0.0172926
	3	3q13	3	2.6 (22/847)	0.00096094		11.828	1.07527	12.9 (12/93)	P>0.05	-2.09903	0.0358087
	4	4q12	1	8.4 (27/320)	P>0.05		37.1429	0	37.1 (13/35)	0.00388272	-2.36512	0.018021
	4	4q21	2	0			14.7059	0	14.7 (10/68)	P>0.05	-2.1754	0.0295957
	4	4q32	2	0			23.5294	0	23.5 (12/51)	P>0.05	-2.31073	0.0208444
	5	5q31	2	0			19.2708	6.25	25.5 (49/192)	0.000850214	-0.795895	>0.05
	5	5q33	2	0			18.1818	5.05051	23.2 (23/99)	P>0.05	-2.0137	0.0440349
	6	6p22	2	0			4.48718	11.5385	16 (25/156)	P>0.05	2.95531	0.00312291
	6	6q22	2	0			18.75	0	18.8 (12/64)	P>0.05	-2.29465	0.0217494
	8	8q21	2	0			24.2424	0	24.2 (16/66)	P>0.05	-2.59779	0.00938068
	9	9q34	3	2.1 (2/94)	P>0.05		0.877193	14.9123	15.8 (36/228)	P>0.05	2.35821	0.0183608
	10	10q21	2	0			12.7273	10.9091	23.6 (13/55)	P>0.05	2.30061	0.021411
	11	11q13	2	0			4.05904	15.1292	19.2 (52/271)	P>0.05	2.04211	0.0411364
	12	12p12	2	0			24.0741	1.85185	25.9 (14/54)	P>0.05	-1.98159	0.047519
	14	14q32	2	0			12.6316	2.10526	14.7 (28/190)	P>0.05	-2.81117	0.00493497
	15	15q11	2	0			52.5424	0	52.5 (62/118)	4.33042e-28	-5.48697	4.08542e-08
	15	15q15	2	0			6.59341	12.0879	18.7 (17/91)	P>0.05	2.72151	0.00649729
	15	15q21	2	0			13.75	1.25	15 (12/80)	P>0.05	-2.01468	0.0439326
	16	16p13	2	0			5.32319	22.0532	27.4 (72/263)	6.22831e-07	2.18677	0.0287565
	16	16q22	2	0			3.78788	21.2121	25 (33/132)	0.0163224	4.09652	4.19242e-05
	16	16q24	2	0			2.38095	25	27.4 (23/84)	0.0183484	4.06956	4.7083e-05
	17	17q11	2	0			5.15464	16.4948	21.6 (21/97)	P>0.05	3.18053	0.00146968
	17	17q21	2	0			2.98013	9.27152	12.3 (37/302)	P>0.05	3.1048	0.00190365
	19	19p12	2	0			61.7647	0	61.8 (21/34)	1.48422e-12	-3.00989	0.0026127
	19	19p13	Combined	4.9 (5/102)	P>0.05		3.03541	15.0084	18 (107/593)	P>0.05	3.4626	0.00053485
	20	20q11	2	0			1.48148	13.3333	14.8 (20/135)	P>0.05	2.36308	0.0181213
	20	20q13	3	3.7 (22/596)	P>0.05		2.94118	18.0672	21 (50/238)	P>0.05	3.62912	0.000284297
	X	Xq21	2	0			25	0	25 (10/40)	P>0.05	-2.28765	0.0221545
	a. Chi square test
	b. Z test
	c. Include cytobands with more than 5.8% of altered SNPs and p-value <0.05 (chi square) compared with the whole genome. The cytobands shadowed in blue were those with more than 30% of CN altered SNPs.
	d. Include cytobands with more than 15.1% of deregulated genes and p-value <0.05 (chi square) compared with the whole genome or Z score > 1.96 or < -1.96.
	Z score was calculated as part of the Parametric Gene Set Enrichment Analysis
