# Supplementary material for: Amplified Genes May Be Overexpressed, Unchanged, or Downregulated in Cervical Cancer Cell Lines
Source: PLoS One. 2012 Mar 7;7(3):e32667. doi: 10.1371/journal.pone.0032667 (PMC3296745; doi:10.1371/journal.pone.0032667)
Supplement: Table S4 — Genes expressed differently in cell lines compared with normal cervical epitheliuma. a. This list of genes was obtained when the 4 cell lines, each by triplicate, were compared together against the control sample (n = 10) using the SAM method. b. Fold Change was obtained dividing the normalized signals of cell lines/healthy cervical controls. (XLSX) [file pone.0032667.s006.xlsx]

## Sheet: Table TS-III
Table supplementary S4. Genes expressed differently in cell lines compared with normal cervical epitheliuma
GEN SYMBOL	GENE ID	CHROMOSOME	CYTOBAND	GENE START	Score(d)	Fold Changeb
OR4F29	729759	1	1p36.33	356723	-6.87925	0.437164
OR4F16	81399	1	1p36.33	610959	-6.87925	0.437164
C1orf159	54991	1	1p36.33	1007068	5.32524	1.61439
ATAD3C	219293	1	1p36.33	1387910	6.00972	2.2021
ATAD3B	83858	1	1p36.33	1397027	5.8197	2.24568
ATAD3A	55210	1	1p36.33	1437418	6.08556	2.28874
TNFRSF14	8764	1	1p36.32	2479150	-5.93258	0.493452
ARHGEF16	27237	1	1p36.32	3369982	5.12705	1.56361
KCNAB2	8514	1	1p36.31	6008967	8.01574	2.82281
CHD5	26038	1	1p36.31	6084440	5.43144	1.61404
RPL22	6146	1	1p36.31	6167667	-7.80038	0.255371
ICMT	23463	1	1p36.31	6203840	6.18475	1.54007
C1orf211	148645	1	1p36.31	6221281	5.08741	1.61889
ENO1	2023	1	1p36.23	8843650	7.02334	2.55321
SLC25A33	84275	1	1p36.22	9522115	6.56157	1.99431
CTNNBIP1	56998	1	1p36.22	9830921	-7.48627	0.44917
MAD2L2	10459	1	1p36.22	11657124	8.76928	3.21575
TNFRSF1B	7133	1	1p36.22	12149647	-9.30011	0.449916
VPS13D	55187	1	1p36.22	12212700	-6.23757	0.384916
AADACL3	126767	1	1p36.21	12698705	5.06968	1.55978
PDPN	10630	1	1p36.21	13782839	-9.56867	0.321355
PRDM2	7799	1	1p36.21	13903937	-7.1594	0.305465
C1orf144	26099	1	1p36.13	16566307	5.66882	1.65643
MFAP2	4237	1	1p36.13	17173584	-6.60613	0.528366
SDHB	6390	1	1p36.13	17217804	5.64911	1.9013
RCC2	55920	1	1p36.13	17605866	5.74606	1.79636
PAX7	5081	1	1p36.13	18830087	5.13446	1.75215
KIAA0090	23065	1	1p36.13	19417171	6.39611	1.83419
NBL1	4681	1	1p36.13	19842313	-5.59006	0.528704
C1orf166	79594	1	1p36.12	20698530	5.58124	1.76858
C1QA	712	1	1p36.12	22835705	-9.51438	0.396585
C1QC	714	1	1p36.12	22842734	-11.1429	0.322935
C1QB	713	1	1p36.12	22852269	-5.79188	0.499505
AOF2	23028	1	1p36.12	23218533	5.28646	2.29558
TCEA3	6920	1	1p36.12	23580142	-6.32676	0.223397
MAN1C1	57134	1	1p36.11	25816546	-8.40684	0.516918
C1orf135	79000	1	1p36.11	26033084	10.5398	4.19372
STMN1	3925	1	1p36.11	26099194	6.71922	2.14973
CCDC21	64793	1	1p36.11	26433280	10.2483	2.80477
CD52	1043	1	1p36.11	26516998	-7.70549	0.302428
RPS6KA1	6195	1	1p36.11	26728836	8.48869	2.49286
STX12	23673	1	1p35.3	27972281	-5.52174	0.400912
LOC653566	653566	1	1p35.3	28294148	-5.47683	0.528756
SNHG3-RCC1	751867	1	1p35.3	28705083	5.79749	2.40187
RCC1	1104	1	1p35.3	28717332	5.79749	2.40187
LAPTM5	7805	1	1p35.2	30977903	-21.9073	0.0744221
COL16A1	1307	1	1p35.2	31890435	-6.36763	0.538596
IQCC	55721	1	1p35.1	32443859	5.90758	1.68739
YARS	8565	1	1p35.1	33013427	5.32315	2.36743
PSMB2	5690	1	1p34.3	35841326	5.67252	2.30923
CLSPN	63967	1	1p34.3	35974405	6.86299	4.23299
MRPS15	64960	1	1p34.3	36693960	7.22206	2.90867
CDCA8	55143	1	1p34.3	37930746	13.607	6.05632
MANEAL	149175	1	1p34.3	38032361	8.32905	3.87898
UTP11L	51118	1	1p34.3	38250971	6.45723	1.90827
RHBDL2	54933	1	1p34.3	39124066	-6.09776	0.360343
C1orf108	79647	1	1p34.3	39229504	6.04089	1.75444
MACF1	23499	1	1p34.2	39319705	-9.14427	0.348079
PPT1	5538	1	1p34.2	40310969	7.29186	1.71494
YBX1	4904	1	1p34.2	42920653	6.06169	1.54072
LEPRE1	64175	1	1p34.2	42984633	5.056	1.90547
TIE1	7075	1	1p34.2	43539251	-6.85489	0.490109
CDC20	991	1	1p34.2	43597213	10.1888	8.38205
KLF17	128209	1	1p34.1	44357109	6.62661	1.98699
KIF2C	11004	1	1p34.1	44978138	13.4791	11.3861
HPDL	84842	1	1p34.1	45565132	7.6677	2.83048
RAD54L	8438	1	1p33	46486004	8.24329	2.97998
CYP4X1	260293	1	1p33	47261827	-9.55154	0.114229
STIL	6491	1	1p33	47488398	9.55238	4.7377
SPATA6	54558	1	1p33	48536865	-8.97387	0.194253
C1orf165	79656	1	1p33	48966129	-6.88592	0.545235
C1orf34	22996	1	1p32.3	51525370	-8.01874	0.380921
EPS15	2060	1	1p32.3	51592523	-6.66993	0.424925
KTI12	112970	1	1p32.3	52270365	5.50078	2.29105
ORC1L	4998	1	1p32.3	52611089	7.57284	5.355
ZYG11A	440590	1	1p32.3	53080996	16.3004	5.8079
ECHDC2	55268	1	1p32.3	53134492	-9.06568	0.32965
PODN	127435	1	1p32.3	53300473	-6.91141	0.416809
LRP8	7804	1	1p32.3	53483800	7.7562	3.09054
TMEM48	55706	1	1p32.3	54005976	6.10941	2.38642
LRRC42	115353	1	1p32.3	54184625	6.24522	2.527
PCSK9	255738	1	1p32.3	55277808	11.715	4.53449
MYSM1	114803	1	1p32.1	58898178	-7.09222	0.27501
JUN	3725	1	1p32.1	59019051	-9.44487	0.181349
FOXD3	27022	1	1p31.3	63561318	6.38174	1.76086
CACHD1	57685	1	1p31.3	64709064	-11.7459	0.150659
AK3L1	205	1	1p31.3	65385820	6.95306	1.71452
LOC645195	645195	1	1p31.3	65486435	7.46988	3.82338
DNAJC6	9829	1	1p31.3	65503018	7.46988	3.82338
LEPR	3953	1	1p31.3	65658906	-6.44915	0.416491
LEPROT	54741	1	1p31.3	65658907	-6.44915	0.416491
SGIP1	84251	1	1p31.3	66772413	-7.9895	0.327353
DEPDC1	55635	1	1p31.2	68713526	6.82168	7.3468
HHLA3	11147	1	1p31.1	70593081	5.06449	2.48661
CTH	1491	1	1p31.1	70649543	9.7997	5.87161
NEGR1	257194	1	1p31.1	71641213	-5.84437	0.542141
FPGT	8790	1	1p31.1	74436514	-5.99669	0.298645
TNNI3K	51086	1	1p31.1	74473673	-5.99669	0.298645
GIPC2	54810	1	1p31.1	78284177	-11.0948	0.298438
IFI44L	10964	1	1p31.1	78858741	-6.43471	0.172432
IFI44	10561	1	1p31.1	78888104	-10.6373	0.161235
ELTD1	64123	1	1p31.1	79128037	-23.0211	0.0610034
LPHN2	23266	1	1p31.1	82038670	-19.0831	0.0494247
MCOLN3	55283	1	1p22.3	85256353	-5.56395	0.257069
CLCA2	9635	1	1p22.3	86662413	-5.83596	0.0407659
CLCA4	22802	1	1p22.3	86785347	-7.29057	0.0229864
HS2ST1	9653	1	1p22.3	87152950	-5.37143	0.377934
LOC339524	339524	1	1p22.3	87368260	-5.37143	0.377934
GBP3	2635	1	1p22.2	89244948	-8.55159	0.177467
GBP1	2633	1	1p22.2	89290593	-8.55159	0.177467
GBP4	115361	1	1p22.2	89420044	-10.0548	0.17223
GBP5	115362	1	1p22.2	89498853	-8.00538	0.287312
GBP6	163351	1	1p22.2	89602024	-7.5446	0.0300687
TGFBR3	7049	1	1p22.2	91920575	-6.40534	0.26548
BCAR3	8412	1	1p22.1	93799936	7.03677	3.18906
GCLM	2730	1	1p22.1	94125178	6.27566	2.49377
PTBP2	58155	1	1p21.3	96959966	-5.7017	0.378351
DPYD	1806	1	1p21.3	97315887	-6.49345	0.371348
FRRS1	391059	1	1p21.2	99946847	-6.88286	0.351058
VCAM1	7412	1	1p21.2	100957885	-7.33546	0.177181
RNPC3	55599	1	1p21.1	103893839	-6.98007	0.258838
AMY2B	280	1	1p21.1	103898845	-8.79397	0.0999676
AMY2A	279	1	1p21.1	103961522	-8.97294	0.0666133
AMY1A	276	1	1p21.1	103999664	-8.97294	0.0666133
AMY1B	277	1	1p21.1	104031564	-8.97294	0.0666133
AMY1C	278	1	1p21.1	104093964	-8.97294	0.0666133
C1orf119	56900	1	1p13.3	109434926	-5.5389	0.538846
PSRC1	84722	1	1p13.3	109623701	5.55825	2.64265
AMPD2	271	1	1p13.3	109963982	7.25453	2.37837
GSTM4	2948	1	1p13.3	110000226	-8.3944	0.272336
GSTM2	2946	1	1p13.3	110012214	-8.3944	0.272336
GSTM5	2949	1	1p13.3	110056388	-12.712	0.101939
RBM15	64783	1	1p13.3	110683468	5.14944	1.76861
SLC16A4	9122	1	1p13.3	110707028	-8.58407	0.230078
KCNA3	3738	1	1p13.3	111015833	-7.52563	0.232431
CD53	963	1	1p13.3	111215344	-14.3041	0.0763236
C1orf162	128346	1	1p13.2	111818127	-7.95743	0.389013
LOC128322	128322	1	1p13.2	113092240	7.46924	2.4122
SLC16A1	6566	1	1p13.2	113255992	8.40448	4.79006
PTPN22	26191	1	1p13.2	114157960	-7.33604	0.302425
DCLRE1B	64858	1	1p13.2	114249561	6.92435	2.98029
OLFML3	56944	1	1p13.2	114323553	-10.8409	0.180938
DENND2C	163259	1	1p13.2	114928719	5.48284	1.88297
CD2	914	1	1p13.1	117098609	-8.64855	0.276153
SPAG17	200162	1	1p12	118297811	-7.20345	0.337092
NOTCH2	4853	1	1p12	120255699	-5.55446	0.512908
FAM72B	653820	1	1p12	120640528	6.75525	5.27224
FCGR1B	2210	1	1p11.2	120728657	-7.16252	0.390986
LOC644591	644591	1	1q21.1	142555943	6.60465	1.56998
FAM72D	728833	1	1q21.1	142617325	6.75525	5.27224
PDE4DIP	9659	1	1q21.1	143562784	-9.35919	0.432965
NOTCH2NL	388677	1	1q21.1	143920468	-5.55446	0.512908
TXNIP	10628	1	1q21.1	144149939	-6.07698	0.176821
ANKRD34A	284615	1	1q21.1	144181865	7.20479	1.86691
ANKRD35	148741	1	1q21.1	144260566	-5.71723	0.243447
PPIAL4	164022	1	1q21.1	146421384	6.60465	1.56998
NBPF14	25832	1	1q21.1	146470266	-5.55446	0.512908
LOC645166	645166	1	1q21.1	147194916	-8.77969	0.400812
LOC100132417	100132417	1	1q21.1	147635924	-7.16252	0.390986
FCGR1A	2209	1	1q21.2	148020912	-7.16252	0.390986
HIST2H3D	653604	1	1q21.2	148051450	5.44612	3.15152
HIST2H3C	126961	1	1q21.2	148078883	5.44612	3.15152
HIST2H2AA3	8337	1	1q21.2	148080409	5.53477	2.86563
HIST2H2BC	337873	1	1q21.2	148088383	7.10515	2.28605
HIST2H2AA4	723790	1	1q21.2	148089252	5.53477	2.86563
HIST2H3A	333932	1	1q21.2	148090805	5.44612	3.15152
HIST2H2BE	8349	1	1q21.2	148122634	7.10515	2.28605
HIST2H2AC	8338	1	1q21.2	148125149	5.53477	2.86563
SF3B4	10262	1	1q21.2	148161835	5.17484	1.88285
C1orf54	79630	1	1q21.2	148511822	-8.83668	0.403443
ECM1	1893	1	1q21.2	148747207	-5.73556	0.181563
CTSS	1520	1	1q21.2	148969175	-13.3677	0.109968
CTSK	1513	1	1q21.2	149035311	-27.4724	0.0235159
LASS2	29956	1	1q21.2	149204273	5.14672	1.87106
C1orf56	54964	1	1q21.2	149286883	6.04858	1.60726
PIP5K1A	8394	1	1q21.2	149437696	11.5612	2.92729
PI4KB	5298	1	1q21.2	149531037	6.13536	1.61168
RFX5	5993	1	1q21.2	149579740	9.18561	2.35981
MRPL9	65005	1	1q21.3	149998747	5.86567	2.34544
OAZ3	51686	1	1q21.3	150005755	5.86567	2.34544
CRNN	49860	1	1q21.3	150648343	-9.52886	0.028886
CRCT1	54544	1	1q21.3	150753602	-7.76212	0.0675348
LCE3D	84648	1	1q21.3	150818484	-6.06372	0.145544
SPRR1A	6698	1	1q21.3	151223181	-10.4619	0.0267242
SPRR3	6707	1	1q21.3	151240847	-15.4978	0.012181
SPRR1B	6699	1	1q21.3	151270303	-9.757	0.0470037
SPRR2D	6703	1	1q21.3	151278825	-6.98789	0.258648
SPRR2A	6700	1	1q21.3	151295220	-13.3818	0.00986816
SPRR2B	6701	1	1q21.3	151309341	-10.1848	0.134258
SPRR2E	6704	1	1q21.3	151332235	-5.58714	0.0986105
S100A9	6280	1	1q21.3	151596954	-8.46444	0.0388868
S100A12	6283	1	1q21.3	151612808	-5.37374	0.286937
S100A8	6279	1	1q21.3	151629132	-16.6186	0.00652769
S100A14	57402	1	1q21.3	151853355	-8.17428	0.058569
ILF2	3608	1	1q21.3	151901138	5.86452	1.89058
GATAD2B	57459	1	1q21.3	152043825	6.10122	1.76459
SLC39A1	27173	1	1q21.3	152198212	10.4419	2.92014
UBE2Q1	55585	1	1q21.3	152787675	9.16858	1.81777
ADAR	103	1	1q21.3	152821157	5.25204	1.56917
EFNA1	1942	1	1q22	153366973	7.00701	3.28178
SYT11	23208	1	1q22	154095924	-6.47002	0.337975
SNORA42	677823	1	1q22	154156324	-9.81153	0.113487
ARHGEF2	9181	1	1q22	154183269	5.28975	1.99639
MAPBPIP	28956	1	1q22	154291229	5.96775	1.74044
RAB25	57111	1	1q22	154297590	-6.16658	0.0746892
SEMA4A	64218	1	1q22	154390012	-6.07363	0.485331
SLC25A44	9673	1	1q22	154430523	5.22267	1.92535
SMG5	23381	1	1q22	154485639	5.36989	1.73374
IQGAP3	128239	1	1q22	154761821	10.7808	5.92365
NES	10763	1	1q23.1	154905179	-5.61776	0.598719
HDGF	3068	1	1q23.1	154978526	8.81507	2.86837
PRCC	5546	1	1q23.1	155003898	7.19165	2.58003
PEAR1	375033	1	1q23.1	155130147	-5.67899	0.585322
MNDA	4332	1	1q23.1	157067792	-6.09043	0.527213
DARC	2532	1	1q23.2	157441134	-5.89425	0.463299
SLAMF6	114836	1	1q23.2	158721444	-6.36256	0.341796
CD84	8832	1	1q23.3	158782419	-8.33835	0.362248
CD48	962	1	1q23.3	158915160	-8.38084	0.214467
SLAMF7	57823	1	1q23.3	158975701	-6.43845	0.199167
PVRL4	81607	1	1q23.3	159308120	-6.07184	0.315698
FCER1G	2207	1	1q23.3	159451711	-13.2771	0.238738
FCGR2A	2212	1	1q23.3	159741844	-10.3826	0.204572
FCGR3A	2214	1	1q23.3	159778173	-5.80198	0.452453
FCGR2C	9103	1	1q23.3	159817762	-10.858	0.138364
FCGR3B	2215	1	1q23.3	159859610	-6.14416	0.384657
FCGR2B	2213	1	1q23.3	159899564	-8.69813	0.275283
DDR2	4921	1	1q23.3	160868852	-8.2763	0.123252
RGS5	8490	1	1q23.3	161378716	-17.454	0.0287368
NUF2	83540	1	1q23.3	161558347	5.71983	5.79157
PBX1	5087	1	1q23.3	162795561	-6.35103	0.258943
UCK2	7371	1	1q24.1	164063514	5.60205	2.97516
GPR161	23432	1	1q24.2	166320621	5.36714	1.67239
DPT	1805	1	1q24.2	166931330	-7.94368	0.18096
SELP	6403	1	1q24.2	167824711	-17.1041	0.236277
SELE	6401	1	1q24.2	167958406	-7.70388	0.402195
PRRX1	5396	1	1q24.2	168899937	-22.2916	0.0548082
FMO2	2327	1	1q24.3	169421012	-6.29744	0.0967752
FMO4	2329	1	1q24.3	169550110	-9.17167	0.370028
DNM3	26052	1	1q24.3	170077261	-9.40727	0.390993
MIRN199A2	406977	1	1q24.3	170380297	-5.86509	0.522615
CENPL	91687	1	1q25.1	172035628	9.43134	3.20267
LOC730167	730167	1	1q25.2	174852027	11.4995	4.84785
SEC16B	89866	1	1q25.2	176164865	-6.48892	0.550563
LOC730102	730102	1	1q25.2	176243839	-6.48892	0.550563
ABL2	27	1	1q25.2	177335085	7.03959	2.44742
IER5	51278	1	1q25.3	179324261	5.23037	2.66436
LOC730144	730144	1	1q25.3	180571116	5.78439	2.54575
RNASEL	6041	1	1q25.3	180809395	-11.2699	0.27625
C1orf26	54823	1	1q25.3	183392815	-6.4224	0.409709
HMCN1	83872	1	1q25.3	183970306	-10.8216	0.192514
RGS18	64407	1	1q31.2	190394215	-5.39645	0.611575
RGS1	5996	1	1q31.2	190811480	-13.1719	0.0626684
RGS13	6003	1	1q31.2	190871905	-7.47692	0.343912
PTPRC	5788	1	1q31.3	196874760	-11.7742	0.0633398
NR5A2	2494	1	1q32.1	198263393	-7.72265	0.437861
ZNF281	23528	1	1q32.1	198642043	5.5445	1.60107
KIF14	9928	1	1q32.1	198787930	6.1652	6.28168
PHLDA3	23612	1	1q32.1	199701245	6.0853	1.85236
IPO9	55705	1	1q32.1	200064911	5.50915	2.08235
LMOD1	25802	1	1q32.1	200132207	-11.3075	0.276793
RNPEP	6051	1	1q32.1	200218389	10.8627	2.17115
UBE2T	29089	1	1q32.1	200567408	11.8978	8.02246
ADIPOR1	51094	1	1q32.1	201176576	6.74287	1.86683
TMEM183A	92703	1	1q32.1	201243159	6.44054	1.98409
BTG2	7832	1	1q32.1	201541287	-11.0261	0.24892
FMOD	2331	1	1q32.1	201576375	-16.0287	0.102727
PRELP	5549	1	1q32.1	201711506	-11.8941	0.208924
PPP1R15B	84919	1	1q32.1	202639143	11.8159	3.97932
LRRN2	10446	1	1q32.1	202852924	6.02176	1.86314
SLC41A1	254428	1	1q32.1	204024844	7.41867	2.79507
FAM72A	729533	1	1q32.1	204299717	6.75525	5.27224
C1orf186	440712	1	1q32.1	204405495	-5.71477	0.291465
PIGR	5284	1	1q32.1	205168495	-5.5142	0.0472441
MIRN29C	407026	1	1q32.2	206041819	-6.72544	0.34551
MIRN29B2	407025	1	1q32.2	206042410	-5.57317	0.378134
CD34	947	1	1q32.2	206126506	-9.68424	0.153723
LAMB3	3914	1	1q32.2	207854838	5.62622	2.50762
C1orf107	27042	1	1q32.2	208067956	6.57396	1.93957
NEK2	4751	1	1q32.3	209902745	8.41626	6.95727
DTL	51514	1	1q32.3	210275754	10.1716	12.0801
C1orf75	55248	1	1q32.3	210604439	7.08174	2.48221
FLVCR1	28982	1	1q32.3	211098220	5.14463	2.60445
PTPN14	5784	1	1q41	212597634	6.13289	2.53488
CENPF	1063	1	1q41	212843155	5.48994	5.83436
LYPLAL1	127018	1	1q41	217413844	-6.06857	0.23018
TLR5	7100	1	1q41	221350207	-11.0024	0.290113
PARP1	142	1	1q42.12	224615015	8.92956	3.02117
LOC100130093	100130093	1	1q42.13	225982879	8.06727	1.90681
JMJD4	65094	1	1q42.13	225985558	8.06727	1.90681
C1orf142	116841	1	1q42.13	225989320	8.06727	1.90681
WNT9A	7483	1	1q42.13	226175320	5.67834	1.81793
TRIM11	81559	1	1q42.13	226648000	5.05919	1.99165
HIST3H3	8290	1	1q42.13	226679169	5.11925	1.68188
ACTA1	58	1	1q42.13	227633615	6.33587	1.71656
TAF5L	27097	1	1q42.13	227795481	5.053	1.7761
KIAA0133	9816	1	1q42.13	227828604	8.29904	3.05722
GALNT2	2590	1	1q42.13	228269651	5.65967	2.78238
SIPA1L2	57568	1	1q42.2	230600334	-6.09964	0.48362
KCNK1	3775	1	1q42.2	231816373	7.55874	2.75943
TBCE	6905	1	1q42.3	233597351	5.50533	1.5931
LYST	1130	1	1q42.3	233890966	-7.25694	0.199997
NID1	4811	1	1q42.3	234205753	-22.9229	0.0665424
MT1P2	645745	1	1q43	235233975	5.45943	2.27611
LOC100130331	100130331	1	1q43	236092098	7.07879	1.79172
FH	2271	1	1q43	239727526	5.52631	2.20574
EXO1	9156	1	1q43	240078158	8.52945	9.27599
TFB2M	64216	1	1q44	244770489	6.09506	1.98477
RNF144A	9781	2	2p25.1	6974974	-5.48287	0.411425
ID2	3398	2	2p25.1	8739564	-6.16722	0.253474
GRHL1	29841	2	2p25.1	10009273	-6.71476	0.116491
ATP6V1C2	245973	2	2p25.1	10779226	-6.96066	0.238439
PDIA6	10130	2	2p25.1	10840968	-6.96066	0.238439
PQLC3	130814	2	2p25.1	11212991	-8.50671	0.359257
GREB1	9687	2	2p25.1	11591693	-11.1238	0.1418
TRIB2	28951	2	2p25.1	12774659	-10.248	0.323431
FAM49A	81553	2	2p24.3	16597382	-5.67682	0.242065
VSNL1	7447	2	2p24.2	17585288	-5.75556	0.120093
NCOA1	8648	2	2p23.3	24660850	-6.51733	0.295646
CENPO	79172	2	2p23.3	24869841	14.9066	4.77193
ADCY3	109	2	2p23.3	24895542	14.9066	4.77193
KCNK3	3777	2	2p23.3	26769123	6.98145	1.9269
CENPA	1058	2	2p23.3	26862386	11.4368	4.21295
AGBL5	60509	2	2p23.3	27127995	7.51087	2.09778
CAD	790	2	2p23.3	27293762	5.25806	2.48319
PPM1G	5496	2	2p23.3	27457565	10.8918	2.43129
ZNF512	84450	2	2p23.3	27659397	6.2559	1.77857
XAB1	11321	2	2p23.2	27705407	6.2559	1.77857
LBH	81606	2	2p23.1	30307901	-9.97115	0.333776
EHD3	30845	2	2p23.1	31310707	-6.99383	0.491681
LTBP1	4052	2	2p22.3	33025896	-19.0826	0.0498516
RASGRP3	25780	2	2p22.3	33514920	-7.56567	0.3056
VIT	5212	2	2p22.2	36777418	5.47224	3.55168
HEATR5B	54497	2	2p22.2	37061657	-5.69678	0.460911
SLC8A1	6546	2	2p22.1	40192790	-13.381	0.184685
ATP6V1E2	90423	2	2p21	46592490	5.75101	1.74489
STON1-GTF2A1L	286749	2	2p16.3	48649663	-10.4839	0.275729
STON1	11037	2	2p16.3	48661267	-10.4839	0.275729
GTF2A1L	11036	2	2p16.3	48698452	-10.4839	0.275729
CCT4	10575	2	2p15	61948766	6.27727	2.01651
OTX1	5013	2	2p15	63131469	5.29556	1.92474
MEIS1	4211	2	2p14	66516036	-16.6562	0.0622341
PNO1	56902	2	2p14	68238509	5.64002	2.06017
PLEK	5341	2	2p14	68445826	-12.027	0.204298
C2orf13	200558	2	2p14	68548246	-6.83019	0.326883
PROKR1	10887	2	2p14	68726458	-6.83019	0.326883
SPR	6697	2	2p13.2	72968056	5.44683	2.61561
SMYD5	10322	2	2p13.2	73294874	5.23787	2.28194
FBXO41	150726	2	2p13.2	73335308	7.64875	2.13983
DGUOK	1716	2	2p13.1	74007461	5.49138	1.85504
MTHFD2	10797	2	2p13.1	74279198	5.99416	2.57293
SEMA4F	10505	2	2p13.1	74734901	5.40695	1.64664
TACR1	6869	2	2p13.1	75129738	-9.51622	0.338733
LOC1720	1720	2	2p12	82937438	5.23979	4.28498
VAMP8	8673	2	2p11.2	85658228	-5.81727	0.51121
USP39	10713	2	2p11.2	85696794	5.54539	1.87029
ST3GAL5	8869	2	2p11.2	85919782	-8.44529	0.486539
VPS24	51652	2	2p11.2	86584064	-7.04206	0.508831
RNF103	7844	2	2p11.2	86684027	-7.04206	0.508831
LOC440871	440871	2	2p11.2	87419112	-6.76632	0.0849821
IGKC	3514	2	2p11.2	88937989	-8.45054	0.0911069
IGK@	50802	2	2p11.2	88937989	-8.31329	0.0675087
IGKV3-20	28912	2	2p11.2	89223172	-6.56202	0.0953525
IGKV3D-15	28875	2	2p11.2	89791050	-7.2911	0.109651
IGKV3D-11	28876	2	2p11.2	89849045	-6.76632	0.0849821
LOC642838	642838	2	2p11.1	91360653	-6.88757	0.202595
MAL	4118	2	2q11.1	95055206	-8.08859	0.0445042
LOC400986	400986	2	2q11.2	95880570	-5.78603	0.209598
NCAPH	23397	2	2q11.2	96365211	8.0967	5.61037
ANKRD36	375248	2	2q11.2	97143081	-5.78603	0.209598
KIAA1641	57730	2	2q11.2	97487693	-5.78603	0.209598
LONRF2	164832	2	2q11.2	100256185	-8.1104	0.333418
IL1R2	7850	2	2q11.2	101974738	-5.8145	0.193581
IL1R1	3554	2	2q12.1	102136834	-7.82953	0.0650565
TGFBRAP1	9392	2	2q12.2	105249961	5.34055	1.64194
FHL2	2274	2	2q12.2	105343715	6.53458	2.0277
SULT1C2	6819	2	2q12.3	108271527	-6.44149	0.527571
SULT1C4	27233	2	2q12.3	108360853	-14.9308	0.15274
BUB1	699	2	2q13	111111881	9.62105	7.93497
ANAPC1	64682	2	2q13	112243109	5.31021	1.99993
MERTK	10461	2	2q13	112372662	-8.07104	0.286162
TTL	150465	2	2q13	112956214	10.38	2.24903
POLR1B	84172	2	2q13	113016084	8.18115	2.34703
SLC20A1	6574	2	2q13	113119998	6.07005	3.13091
CKAP2L	150468	2	2q13	113211915	5.72446	3.37285
EN1	2019	2	2q14.2	119316217	5.51734	1.69804
BIN1	274	2	2q14.3	127522077	6.11148	1.96325
AMMECR1L	83607	2	2q14.3	128335674	5.35725	1.5195
A26C1B	728378	2	2q21.1	130547578	5.38868	1.57177
SMPD4	55627	2	2q21.1	130625450	8.43481	2.19593
IMP4	92856	2	2q21.1	130816959	5.83747	2.28163
LOC653781	653781	2	2q21.1	131085576	5.38868	1.57177
A26C1A	445582	2	2q21.1	131692394	5.38868	1.57177
FLJ41352	150776	2	2q21.1	131958542	8.95083	2.10071
HNMT	3176	2	2q22.1	138438278	-6.75988	0.279364
ARHGAP15	55843	2	2q22.2	143603433	-8.16771	0.300915
ZEB2	9839	2	2q22.3	144862053	-24.8146	0.06831
ACVR2A	92	2	2q22.3	148319040	-8.30862	0.268212
RBM43	375287	2	2q23.3	151814156	-5.72863	0.435645
NMI	9111	2	2q23.3	151835231	-6.30864	0.425631
GALNT5	11227	2	2q24.1	157822586	-7.26424	0.0727744
PSCDBP	9595	2	2q24.1	157979377	-8.54344	0.112998
PKP4	8502	2	2q24.1	159021722	-7.50629	0.545346
TANC1	85461	2	2q24.1	159533392	-6.37268	0.431817
BAZ2B	29994	2	2q24.2	159883736	-7.91276	0.152222
CD302	9936	2	2q24.2	160333610	-9.96419	0.0840624
DPP4	1803	2	2q24.2	162557001	-15.1298	0.0523026
FAM130A2	80034	2	2q24.3	166137136	-11.9295	0.276419
NOSTRIN	115677	2	2q24.3	169367353	-10.9496	0.217131
SPC25	57405	2	2q24.3	169435647	7.18881	5.24358
BBS5	129880	2	2q31.1	170044252	-6.82987	0.410024
KBTBD10	10324	2	2q31.1	170074458	-6.82987	0.410024
GAD1	2571	2	2q31.1	171381446	5.30627	2.71052
DLX2	1746	2	2q31.1	172672412	6.28641	2.1065
GPR155	151556	2	2q31.1	175004621	-6.32439	0.411843
WIPF1	7456	2	2q31.1	175132548	-8.30637	0.195951
ITGA4	3676	2	2q31.3	182029864	-13.7828	0.106325
CERKL	375298	2	2q31.3	182109650	-13.7828	0.106325
FRZB	2487	2	2q32.1	183406982	-13.007	0.0945778
CALCRL	10203	2	2q32.1	187916091	-24.4362	0.056458
GULP1	51454	2	2q32.2	188865635	-5.94437	0.140802
COL3A1	1281	2	2q32.2	189547344	-21.0442	0.0303687
COL5A2	1290	2	2q32.2	189604886	-16.1106	0.144545
SLC40A1	30061	2	2q32.2	190133561	-21.3749	0.0225003
ANKAR	150709	2	2q32.2	190249675	-9.3528	0.37647
HIBCH	26275	2	2q32.2	190777605	-5.58873	0.197081
FLJ20160	54842	2	2q32.2	190981326	-8.60385	0.334753
SDPR	8436	2	2q32.3	192407281	-7.60158	0.469235
STK17B	9262	2	2q32.3	196710102	-6.71853	0.30723
ANKRD44	91526	2	2q33.1	197567495	-9.62704	0.208068
RFTN2	130132	2	2q33.1	198143773	-21.5974	0.137342
PLCL1	5334	2	2q33.1	198539545	-5.62069	0.439636
CFLAR	8837	2	2q33.1	201689135	-7.88463	0.280543
CYP20A1	57404	2	2q33.2	203811409	-6.08605	0.28392
LOC389072	389072	2	2q33.3	208401288	-6.90663	0.403739
FLJ23861	151050	2	2q34	210593680	-7.3528	0.289502
CPS1	1373	2	2q34	211129583	5.16314	27.4512
IKZF2	22807	2	2q34	213572653	-9.09773	0.168164
SPAG16	79582	2	2q34	213857361	-6.26994	0.493403
FN1	2335	2	2q35	215933422	-7.44954	0.110337
MREG	55686	2	2q35	216515559	-6.73223	0.29094
IGFBP2	3485	2	2q35	217206372	-6.16443	0.393215
CYP27A1	1593	2	2q35	219354949	-7.94134	0.349324
SGPP2	130367	2	2q36.1	222997566	-12.4418	0.0775986
DOCK10	55619	2	2q36.2	225338051	-8.66517	0.106148
IRS1	3667	2	2q36.3	227308182	-7.15872	0.412755
RHBDD1	84236	2	2q36.3	227409017	-11.7109	0.411921
COL4A4	1286	2	2q36.3	227575671	5.28656	1.82903
PID1	55022	2	2q36.3	229596933	-6.49529	0.428878
HTR2B	3357	2	2q37.1	231681199	-9.48278	0.16874
INPP5D	3635	2	2q37.1	233633280	-11.3166	0.292165
SCARNA5	677775	2	2q37.1	233849111	-5.39788	0.280034
HJURP	55355	2	2q37.1	234410225	9.82285	4.87612
MSL3L2	151507	2	2q37.1	234438814	5.88901	4.22565
COL6A3	1293	2	2q37.3	237897401	-29.4229	0.0160981
LRRFIP1	9208	2	2q37.3	238265668	-6.21476	0.322894
PER2	8864	2	2q37.3	238817418	-7.45275	0.329555
HDLBP	3069	2	2q37.3	241815352	7.2401	1.86351
CNTN4	152330	3	3p26.3	2117247	-13.2954	0.16093
LRRN1	57633	3	3p26.2	3816121	-6.97204	0.221367
BRPF1	7862	3	3p25.3	9748434	-1.0557	1.15433
TTLL3	26140	3	3p25.3	9826405	-7.23133	0.431783
RPUSD3	285367	3	3p25.3	9854533	5.19829	2.10224
FANCD2	2177	3	3p25.3	10043113	5.56855	1.61622
C3orf24	115795	3	3p25.3	10098004	5.56855	1.61622
NUP210	23225	3	3p25.1	13332737	10.4757	3.81241
FBLN2	2199	3	3p25.1	13565625	-7.37311	0.349204
FGD5	152273	3	3p24.3	14835810	-11.4748	0.425155
SATB1	6304	3	3p24.3	18364438	-9.10623	0.107949
PCAF	8850	3	3p24.3	20056528	-6.69483	0.201448
SGOL1	151648	3	3p24.3	20177087	6.1409	3.74029
ZNF385D	79750	3	3p24.3	21437651	-10.2305	0.320651
UBE2E1	7324	3	3p24.2	23822443	-5.50859	0.56026
RPL15	6138	3	3p24.2	23933643	-8.54939	0.319049
LOC100130354	100130354	3	3p24.2	25444121	-6.08567	0.281954
RARB	5915	3	3p24.2	25444758	-6.08567	0.281954
ZCWPW2	152098	3	3p24.1	28406993	-6.02631	0.601723
TGFBR2	7048	3	3p24.1	30622998	-7.3845	0.336202
LBA1	9881	3	3p22.2	36843315	-8.34261	0.30535
LRRFIP2	9209	3	3p22.2	37069502	-5.76654	0.404126
ITGA9	3680	3	3p22.2	37468817	-10.9711	0.290265
PLCD1	5333	3	3p22.2	38023991	-5.99627	0.548605
CX3CR1	1524	3	3p22.2	39279989	-10.7642	0.319531
ENTPD3	956	3	3p22.1	40403694	-5.40152	0.252959
ULK4	54986	3	3p22.1	41263094	-6.36061	0.338216
TRAK1	22906	3	3p22.1	42107750	-6.64679	0.489915
ZNF662	389114	3	3p22.1	42922406	-5.63941	0.575672
ZNF660	285349	3	3p21.32	44601460	-6.46744	0.466747
ZNF197	10168	3	3p21.32	44641515	-6.46744	0.466747
ZNF501	115560	3	3p21.31	44746128	-6.24544	0.532504
FYCO1	79443	3	3p21.31	45934399	-5.77735	0.558113
FLJ78302	729230	3	3p21.31	46370364	-6.64496	0.37354
LTF	4057	3	3p21.31	46452500	-5.7995	0.113091
CSPG5	10675	3	3p21.31	47578732	7.65109	1.66777
CDC25A	993	3	3p21.31	48173672	6.59742	3.94343
UQCRC1	7384	3	3p21.31	48611436	8.95661	2.862
CELSR3	1951	3	3p21.31	48648900	6.34048	2.84379
NCKIPSD	51517	3	3p21.31	48686281	6.63063	1.73243
MIRN425	494337	3	3p21.31	49032584	5.32886	1.6474
USP4	7375	3	3p21.31	49289997	-6.9457	0.509666
AMIGO3	386724	3	3p21.31	49729969	8.55292	1.96905
UBA7	7318	3	3p21.31	49817642	-12.6528	0.276621
TRAIP	10293	3	3p21.31	49841032	6.14853	2.50206
RBM6	10180	3	3p21.31	49952596	-6.84874	0.474916
RASSF1	11186	3	3p21.31	50342221	5.66989	1.7722
WDR51A	25886	3	3p21.1	52084310	7.42117	3.68952
STAB1	23166	3	3p21.1	52504396	-6.22305	0.437485
TKT	7086	3	3p21.1	53234704	9.77943	5.12573
CACNA1D	776	3	3p21.1	53504116	-5.77262	0.192656
PXK	54899	3	3p14.3	58293657	-9.4818	0.222312
ACOX2	8309	3	3p14.3	58465903	-6.70157	0.553191
FAM3D	131177	3	3p14.2	58594710	-9.80932	0.271453
PTPRG	5793	3	3p14.2	61522285	-7.60444	0.226023
CADPS	8618	3	3p14.2	62359061	-5.87665	0.309302
PRICKLE2	166336	3	3p14.1	64054587	-15.4462	0.15633
ADAMTS9	56999	3	3p14.1	64476370	-9.74894	0.197667
FRMD4B	23150	3	3p14.1	69301836	-21.5574	0.0876309
EIF4E3	317649	3	3p13	71814568	-7.00998	0.223861
PDZRN3	23024	3	3p13	73514342	-11.6617	0.201041
LOC100131827	100131827	3	3p12.3	75861802	-6.44137	0.283365
EPHA3	2042	3	3p11.2	89239364	-9.88926	0.245358
STX19	415117	3	3q11.2	95215903	-7.2687	0.523783
C3orf26	84319	3	3q12.1	101019371	6.67112	2.7287
TFG	10342	3	3q12.2	101910850	5.76734	2.17943
ABI3BP	25890	3	3q12.2	101950869	-16.9466	0.0716835
SENP7	57337	3	3q12.3	102525807	-6.23422	0.226774
NFKBIZ	64332	3	3q12.3	103029547	-5.5193	0.303357
CBLB	868	3	3q13.11	106859799	-8.36148	0.356486
CD96	10225	3	3q13.13	112743616	-7.75471	0.217025
CD200	4345	3	3q13.2	113534606	-8.7872	0.180365
BOC	91653	3	3q13.2	114414065	-7.58731	0.349847
SIDT1	54847	3	3q13.2	114733908	-7.26221	0.241335
GRAMD1C	54762	3	3q13.31	115040367	-6.25913	0.349292
ZDHHC23	254887	3	3q13.31	115149438	5.32331	1.77183
ZBTB20	26137	3	3q13.31	115540207	-9.29639	0.225169
LSAMP	4045	3	3q13.31	117011832	-9.16341	0.33289
HCLS1	3059	3	3q13.33	122832936	-17.0431	0.190123
SLC15A2	6565	3	3q13.33	123095977	-7.92534	0.0658911
CD86	942	3	3q13.33	123256911	-6.32386	0.399402
CSTA	1475	3	3q21.1	123526701	-8.40465	0.0300447
PARP15	165631	3	3q21.1	123817215	-5.54437	0.466093
PDIA5	10954	3	3q21.1	124268655	5.76249	1.99116
KALRN	8997	3	3q21.2	125296275	-8.02301	0.581574
UROC1	131669	3	3q21.2	127682814	5.34778	1.55084
CHST13	166012	3	3q21.3	127725866	7.38001	1.93198
GPR175	131601	3	3q21.3	128774606	5.54032	2.5926
MCM2	4171	3	3q21.3	128799943	9.71626	6.68852
PODXL2	50512	3	3q21.3	128830729	6.388	3.75515
RAB43	339122	3	3q21.3	130289108	5.14829	1.70996
ISY1	57461	3	3q21.3	130330925	5.14829	1.70996
ACPP	55	3	3q22.1	133518949	-6.89529	0.208119
ACAD11	84129	3	3q22.1	133759672	-5.80976	0.332438
NPHP3	27031	3	3q22.1	133882144	-5.80976	0.332438
SLCO2A1	6578	3	3q22.1	135134230	-9.37918	0.215691
AMOTL2	51421	3	3q22.1	135556880	7.92689	2.57281
SOX14	8403	3	3q22.3	138966269	5.13466	1.54105
FOXL2	668	3	3q22.3	140145756	5.69452	1.65666
RBP1	5947	3	3q23	140718970	-5.64213	0.323135
SLC9A9	285195	3	3q24	144466754	-13.7383	0.122736
CPA3	1359	3	3q24	150065774	-14.7465	0.0810561
TM4SF18	116441	3	3q25.1	150521545	-12.0725	0.138961
TMEM183B	653659	3	3q25.1	151182138	6.28575	1.87525
P2RY14	9934	3	3q25.1	152412595	-10.3344	0.269602
SGEF	26084	3	3q25.2	155321884	-6.78534	0.295192
GMPS	8833	3	3q25.31	157071019	6.40706	2.1596
KCNAB1	7881	3	3q25.31	157321031	-5.93729	0.581729
C3orf55	152078	3	3q25.32	158743860	-5.67265	0.610091
SCHIP1	29970	3	3q25.33	160474238	7.99253	3.29457
SCARNA7	677767	3	3q26.1	161715389	-8.78844	0.346608
PPM1L	151742	3	3q26.1	161956690	-5.58474	0.442988
C3orf57	165679	3	3q26.1	162545274	-8.175	0.266606
BCHE	590	3	3q26.1	166973386	-6.06357	0.19159
ARPM1	84517	3	3q26.2	170967407	7.1913	1.52295
TNIK	23043	3	3q26.2	172264364	-5.8817	0.481703
TNFSF10	8743	3	3q26.31	173706158	-8.99717	0.105567
AADACL1	57552	3	3q26.31	173831129	6.09047	4.45698
ECT2	1894	3	3q26.31	173951336	7.0965	6.3416
NLGN1	22871	3	3q26.31	174598938	-8.0411	0.376403
NAALADL2	254827	3	3q26.31	176059805	-9.10186	0.227981
AP2M1	1173	3	3q27.1	185375328	6.72183	1.86614
ABCF3	55324	3	3q27.1	185386557	5.3408	2.23385
ALG3	10195	3	3q27.1	185442811	5.77365	3.68257
ECE2	9718	3	3q27.1	185450139	5.56953	2.0878
CAMK2N2	94032	3	3q27.1	185459697	6.07871	1.86109
PSMD2	5708	3	3q27.1	185499716	11.201	2.98984
EIF4G1	1981	3	3q27.1	185515050	6.60818	2.34414
POLR2H	5437	3	3q27.1	185563888	6.37339	2.35963
RFC4	5984	3	3q27.3	187990375	8.28075	3.79474
ST6GAL1	6480	3	3q27.3	188131210	-6.25836	0.131756
MASP1	5648	3	3q27.3	188418632	-12.1769	0.252818
RTP4	64108	3	3q27.3	188568862	-9.97751	0.444585
FAM79B	285386	3	3q28	190372457	-7.66246	0.0846652
TP63	8626	3	3q28	190831910	-5.76291	0.0986655
LEPREL1	55214	3	3q28	191157316	6.96291	5.23876
APOD	347	3	3q29	196776865	-30.5205	0.0216832
MUC4	4585	3	3q29	196959307	-6.06453	0.282389
LOC152217	152217	3	3q29	198153081	6.73843	2.29236
MFI2	4241	3	3q29	198214553	5.85109	2.49707
LOC654254	654254	4	4p16.3	254230	-7.90874	0.551265
ZNF141	7700	4	4p16.3	321617	-5.74539	0.224947
SPON2	10417	4	4p16.3	1150723	-7.42929	0.462064
CRIPAK	285464	4	4p16.3	1375340	-5.53629	0.412075
SLBP	7884	4	4p16.3	1664325	9.32789	1.90608
TACC3	10460	4	4p16.3	1693062	12.078	5.10264
WHSC1	7468	4	4p16.3	1842921	5.10418	1.73315
NAT8L	339983	4	4p16.3	2031385	5.9373	2.05233
D4S234E	27065	4	4p16.2	4438884	-5.71819	0.482936
EVC2	132884	4	4p16.1	5615051	-7.02015	0.551955
PPP2R2C	5522	4	4p16.1	6373206	-9.37675	0.367132
MRFAP1	93621	4	4p16.1	6693346	-5.63628	0.579308
MRFAP1L1	114932	4	4p16.1	6760329	-7.60902	0.423922
KIAA0232	9778	4	4p16.1	6835360	-5.6834	0.394995
AFAP1	60312	4	4p16.1	7811340	5.19825	1.70089
LOC389199	389199	4	4p16.1	7991628	5.19825	1.70089
ACOX3	8310	4	4p16.1	8418909	-6.25904	0.546355
C1QTNF7	114905	4	4p15.33	14950710	-11.8112	0.154562
CD38	952	4	4p15.32	15389029	-5.9052	0.40399
LDB2	9079	4	4p15.32	16112262	-14.9975	0.138799
NCAPG	64151	4	4p15.32	17421623	5.24595	4.39202
LCORL	254251	4	4p15.32	17453941	5.24595	4.39202
SLIT2	9353	4	4p15.31	19864333	-10.2103	0.0553413
MIRN218-1	407000	4	4p15.31	20138995	-6.56827	0.297641
KCNIP4	80333	4	4p15.31	20339337	-8.80906	0.221495
ANAPC4	29945	4	4p15.2	24987946	-6.17143	0.316142
SLC34A2	10568	4	4p15.2	25266533	-5.41486	0.0765942
TBC1D19	55296	4	4p15.2	26194644	-7.34027	0.36618
FLJ16686	401124	4	4p14	35959791	-8.60678	0.308593
FLJ13197	79667	4	4p14	38290206	-6.25917	0.374054
KLF3	51274	4	4p14	38342185	-5.97499	0.394615
TLR1	7096	4	4p14	38474271	-8.83761	0.367778
TLR6	10333	4	4p14	38504803	-5.74376	0.478456
LOC401127	401127	4	4p14	39158378	6.99214	2.00131
C4orf34	201895	4	4p14	39228930	-5.65133	0.321628
RHOH	399	4	4p14	39874922	-6.93805	0.371998
APBB2	323	4	4p13	40510996	-7.14101	0.457631
ATP10D	57205	4	4p12	47182167	-9.30973	0.339919
CORIN	10699	4	4p12	47290775	-6.06477	0.534103
SLAIN2	57606	4	4p12	48038370	-6.3516	0.496031
FRYL	285527	4	4p12	48194137	-6.62536	0.354484
FLJ21511	80157	4	4p12	48683022	-6.5392	0.134364
DCUN1D4	23142	4	4q12	52404033	-5.93492	0.394889
SPATA18	132671	4	4q12	52612350	-7.07403	0.216069
USP46	64854	4	4q12	53155957	-5.55289	0.563306
FIP1L1	81608	4	4q12	53938620	-10.0786	0.329188
LNX1	84708	4	4q12	54020225	-10.0786	0.329188
LOC402176	402176	4	4q12	54546410	-5.46898	0.559682
CHIC2	26511	4	4q12	54570713	-6.36683	0.467423
PDGFRA	5156	4	4q12	54790204	-26.3342	0.0388025
KIT	3815	4	4q12	55218852	-14.3814	0.108253
KDR	3791	4	4q12	55639406	-20.9533	0.104324
EXOC1	55763	4	4q12	56414573	-6.82658	0.32526
POLR2B	5431	4	4q12	57539866	-10.3275	0.257038
IGFBP7	3490	4	4q12	57592001	-10.3275	0.257038
LPHN3	23284	4	4q13.1	62045434	-15.5431	0.223559
CENPC1	1060	4	4q13.2	68020584	-6.64816	0.293448
TMPRSS11D	9407	4	4q13.2	68369189	-8.27436	0.0236383
TMPRSS11A	339967	4	4q13.2	68458614	-7.23238	0.019435
TMPRSS11B	132724	4	4q13.2	68774966	-7.89604	0.0223598
TMPRSS11E	28983	4	4q13.2	68995762	-8.56292	0.0235527
IGJ	3512	4	4q13.3	71740548	-22.4169	0.00577173
RUFY3	22902	4	4q13.3	71806560	-10.3299	0.185776
DKFZP564O0823	25849	4	4q13.3	76077322	-13.812	0.11114
CXCL10	3627	4	4q21.1	77161295	-6.2165	0.143974
LOC100131826	100131826	4	4q21.1	78125030	-8.14082	0.300267
CCNG2	901	4	4q21.1	78297551	-5.88539	0.326226
ANTXR2	118429	4	4q21.21	81045749	-30.6996	0.0597176
RASGEF1B	153020	4	4q21.22	82567243	-10.4046	0.195021
MOP-1	643616	4	4q21.22	82608700	-7.10859	0.274241
CCDC98	84142	4	4q21.23	84601116	-5.84668	0.418665
WDFY3	23001	4	4q21.23	85809719	-7.11022	0.302659
ARHGAP24	83478	4	4q21.3	86615308	-8.12511	0.31814
MAPK10	5602	4	4q21.3	87156656	-23.0027	0.150008
KLHL8	57563	4	4q22.1	88301238	-8.01808	0.365106
SPARCL1	8404	4	4q22.1	88613511	-50.5477	0.00863538
HSP90AB3P	3327	4	4q22.1	89031835	6.40599	2.35596
SPP1	6696	4	4q22.1	89115826	-7.05164	0.167566
NAP1L5	266812	4	4q22.1	89836090	-8.39991	0.434079
GPRIN3	285513	4	4q22.1	90384452	-11.1364	0.287911
MMRN1	22915	4	4q22.1	91035075	-10.8595	0.109509
MGC48628	401145	4	4q22.1	91375205	-8.46089	0.437104
PGDS	27306	4	4q22.3	95438730	-16.2554	0.214804
UNC5C	8633	4	4q22.3	96308712	-5.9903	0.611318
TSPAN5	10098	4	4q23	99612421	-6.94341	0.228156
EMCN	51705	4	4q23	101538004	-22.1227	0.0869071
PPP3CA	5530	4	4q23	102163610	-5.55072	0.460163
BANK1	55024	4	4q24	102930787	-5.72544	0.415356
BDH2	56898	4	4q24	104218231	-5.49421	0.363346
KIAA1546	54790	4	4q24	106287392	-8.05299	0.238528
MGC16169	93627	4	4q24	107186686	-6.61504	0.223527
CYP2U1	113612	4	4q25	109072166	-5.4092	0.580937
LEF1	51176	4	4q25	109188150	-9.58956	0.291748
DC2	58505	4	4q25	109791190	-6.26663	0.522403
CFI	3426	4	4q25	110881297	-9.53215	0.119456
ALPK1	80216	4	4q25	113437948	-6.4623	0.401671
ANK2	287	4	4q26	114190319	-12.8854	0.205282
PRSS12	8492	4	4q26	119421865	-14.33	0.15784
SYNPO2	171024	4	4q26	120029444	-18.9322	0.0567541
LOC401152	401152	4	4q26	120437022	-7.99629	0.275262
MAD2L1	4085	4	4q27	121200037	7.329	3.02652
PRDM5	11107	4	4q27	121835379	-10.8297	0.260152
C4orf31	79625	4	4q27	122176232	-6.87485	0.236474
CCNA2	890	4	4q27	122957975	6.51056	3.99072
SPRY1	10252	4	4q28.1	124537406	-11.6128	0.183509
FAT4	79633	4	4q28.1	126457017	-6.88705	0.2669
INTU	27152	4	4q28.1	128773570	-7.62679	0.416038
PCDH18	54510	4	4q28.3	138659522	-27.286	0.0521668
CCRN4L	25819	4	4q31.1	140156393	8.21119	2.45998
MGST2	4258	4	4q31.1	140806372	-6.03168	0.407931
MAML3	55534	4	4q31.1	140856995	-6.84441	0.299518
GAB1	2549	4	4q31.21	144477500	-7.01128	0.267167
MMAA	166785	4	4q31.22	146779677	-7.187	0.372479
EDNRA	1909	4	4q31.23	148621575	-17.9084	0.0331381
NR3C2	4306	4	4q31.23	149219370	-8.37736	0.260911
MND1	84057	4	4q31.3	154485251	5.79692	3.00627
SFRP2	6423	4	4q31.3	154921192	-5.84941	0.441163
MAP9	79884	4	4q32.1	156483260	-6.69032	0.563223
GUCY1A3	2982	4	4q32.1	156807328	-19.9585	0.0957515
GUCY1B3	2983	4	4q32.1	156888572	-13.1074	0.216735
CTSO	1519	4	4q32.1	157064720	-12.9983	0.124751
PDGFC	56034	4	4q32.1	157902214	-6.33741	0.133171
GRIA2	2891	4	4q32.1	158361186	-5.93562	0.194805
C4orf18	51313	4	4q32.1	159265211	-14.8224	0.0712615
RXFP1	59350	4	4q32.1	159662497	-5.59611	0.478527
KIAA1450	57600	4	4q32.1	159909632	-9.72706	0.357863
NPY1R	4886	4	4q32.2	164464567	-10.1287	0.283082
MARCH1	55016	4	4q32.3	164668499	-6.17522	0.484092
CBR4	84869	4	4q32.3	170145316	-6.02674	0.414456
NBLA00301	79804	4	4q34.1	174688184	-9.31883	0.268755
HPGD	3248	4	4q34.1	175647955	-6.60113	0.0616315
WDR17	116966	4	4q34.2	177224126	-5.862	0.561334
NEIL3	55247	4	4q34.3	178467985	7.37457	4.38141
C4orf41	60684	4	4q35.1	184817440	-5.76248	0.423041
IRF2	3660	4	4q35.1	185545870	-5.37056	0.449248
CCDC111	201973	4	4q35.1	185807896	-6.62645	0.343023
MLF1IP	79682	4	4q35.1	185852230	-6.62645	0.343023
SLC25A4	291	4	4q35.1	186301392	6.86413	1.78768
ANKRD37	353322	4	4q35.1	186554834	-5.78066	0.40797
C4orf20	55325	4	4q35.1	186558437	-6.56845	0.408952
TLR3	7098	4	4q35.1	187227303	-9.86354	0.207918
FAM149A	25854	4	4q35.2	187302989	-6.96678	0.489891
CYP4V2	285440	4	4q35.2	187349668	-8.03759	0.194683
FRG1	2483	4	4q35.2	191098968	-5.71321	0.495508
CCDC127	133957	5	5p15.33	257875	6.1342	2.26121
SDHA	6389	5	5p15.33	271356	14.7963	3.74201
PDCD6	10016	5	5p15.33	324736	5.86599	1.99648
AHRR	57491	5	5p15.33	357291	5.86599	1.99648
LOC116349	116349	5	5p15.33	494613	11.1989	2.24431
EXOC3	11336	5	5p15.33	496334	6.50445	2.07586
LOC25845	25845	5	5p15.33	525222	6.50445	2.07586
CEP72	55722	5	5p15.33	665405	14.5462	3.6266
BRD9	65980	5	5p15.33	916856	8.58624	6.82944
TRIP13	9319	5	5p15.33	946004	10.4453	11.3429
SLC6A19	340024	5	5p15.33	1254766	5.63364	1.82088
CLPTM1L	81037	5	5p15.33	1370999	8.54715	4.54656
LPCAT1	79888	5	5p15.33	1514542	5.83678	2.27705
LOC728613	728613	5	5p15.33	1650672	5.90087	2.21301
NDUFS6	4726	5	5p15.33	1854509	5.62033	2.59477
MED10	84246	5	5p15.31	6425039	10.1387	3.74985
NSUN2	54888	5	5p15.31	6652352	5.34393	3.20373
SRD5A1	6715	5	5p15.31	6686500	7.43555	1.88229
POLS	11044	5	5p15.31	6767718	7.25761	2.49686
CCT5	22948	5	5p15.2	10303282	9.22379	4.2324
CMBL	134147	5	5p15.2	10330707	6.40152	4.21307
DAP	1611	5	5p15.2	10732342	9.51273	4.21731
TRIO	7204	5	5p15.2	14196829	5.81434	2.17129
FAM105B	90268	5	5p15.2	14717783	6.2334	2.11775
ANKH	56172	5	5p15.2	14762019	6.30421	3.35876
FBXL7	23194	5	5p15.1	15553305	-5.60673	0.546036
ZNF622	90441	5	5p15.1	16504628	8.2629	2.9504
MYO10	4651	5	5p15.1	16715016	5.70576	2.35657
FLJ34047	285696	5	5p15.1	17269438	7.00887	2.24118
BASP1	10409	5	5p15.1	17270750	7.91981	5.01537
LOC340096	340096	5	5p15.1	17543693	5.27989	1.66503
LOC391769	391769	5	5p15.1	17687986	5.27989	1.66503
CDH6	1004	5	5p13.3	31229553	-9.61781	0.266238
C5orf22	55322	5	5p13.3	31568158	5.45282	2.7093
GOLPH3	64083	5	5p13.3	32160581	5.70755	1.77572
MTMR12	54545	5	5p13.3	32262868	6.0845	1.99788
TARS	6897	5	5p13.3	33476655	7.9637	4.36332
LOC729915	729915	5	5p13.3	34224715	-5.5502	0.499878
RAD1	5810	5	5p13.2	34941122	9.62739	3.42077
BXDC2	55299	5	5p13.2	34951577	10.0268	3.91745
PRLR	5618	5	5p13.2	35099985	-13.5584	0.154916
SKP2	6502	5	5p13.2	36187946	6.37641	3.05231
NUP155	9631	5	5p13.2	37327698	6.36171	3.20838
FYB	2533	5	5p13.1	39141114	-10.0315	0.209145
C7	730	5	5p13.1	40945356	-6.10531	0.205227
GHR	2690	5	5p12	42459783	-11.7612	0.258894
SEPP1	6414	5	5p12	42835739	-13.3312	0.0228123
LOC648987	648987	5	5p12	43051907	11.3112	3.59743
LOC100132356	100132356	5	5p12	43100978	6.44846	2.78383
C5orf34	375444	5	5p12	43522567	8.60924	6.05212
FGF10	2255	5	5p12	44340854	-9.35483	0.318495
MRPS30	10884	5	5p12	44844784	6.7531	2.6407
ARL15	54622	5	5q11.2	53216371	-9.34737	0.298897
GZMK	3003	5	5q11.2	54355864	-10.4888	0.0986431
GZMA	3001	5	5q11.2	54434230	-7.85903	0.280067
DEPDC1B	55789	5	5q12.1	59928496	5.74833	2.81094
IPO11	51194	5	5q12.1	61744351	-6.15012	0.504666
LOC100130733	100130733	5	5q12.1	61909337	-6.15012	0.504666
RNF180	285671	5	5q12.2	63497427	-14.0099	0.159599
NLN	57486	5	5q12.3	65053841	7.42269	2.47367
MAST4	375449	5	5q12.3	65927932	-5.52135	0.435832
PIK3R1	5295	5	5q13.1	67558218	-8.48407	0.0642684
CCNB1	891	5	5q13.2	68498669	9.3032	6.82528
CENPH	64946	5	5q13.2	68521131	11.3456	3.53963
LOC100133280	100133280	5	5q13.2	70104277	-6.31814	0.416627
NAIP	4671	5	5q13.2	70300066	-7.97206	0.204121
ANKRA2	57763	5	5q13.2	72883919	-5.86068	0.319085
GCNT4	51301	5	5q13.3	74359045	-9.1632	0.225977
COL4A3BP	10087	5	5q13.3	74710821	-6.30296	0.291349
LOC100129566	100129566	5	5q13.3	75708247	5.33875	2.1372
IQGAP2	10788	5	5q13.3	75734905	-7.16853	0.0967033
SERINC5	256987	5	5q14.1	79443230	-9.62154	0.176819
LOC644936	644936	5	5q14.1	79631253	5.55941	1.78137
LOC441089	441089	5	5q14.1	79682180	9.24453	2.41702
DHFR	1719	5	5q14.1	79957801	5.0654	3.19417
RASGRF2	5924	5	5q14.1	80292314	-9.40422	0.38832
SSBP2	23635	5	5q14.1	80751428	-7.63538	0.215714
VCAN	1462	5	5q14.3	82803339	-15.9576	0.0263697
MEF2C	4208	5	5q14.3	88051922	-20.0859	0.0805025
ARRDC3	57561	5	5q14.3	90700297	-8.37686	0.170396
ERAP2	64167	5	5q15	96241024	-7.2805	0.177803
LNPEP	4012	5	5q15	96297102	-7.8812	0.268293
ST8SIA4	7903	5	5q21.1	100170803	-12.9015	0.21428
C5orf13	9315	5	5q22.1	111092892	-5.60058	0.29223
PGGT1B	5229	5	5q22.3	114575476	-5.46735	0.328133
SEMA6A	57556	5	5q23.1	115807150	-12.2765	0.221788
SNCAIP	9627	5	5q23.2	121675719	-15.6329	0.210191
ZNF608	57507	5	5q23.2	124000509	-11.8373	0.29133
LMNB1	4001	5	5q23.2	126140732	6.69659	2.83707
SLC27A6	28965	5	5q23.3	128329109	-6.13307	0.339359
ADAMTS19	171019	5	5q23.3	128824002	-9.13887	0.288253
CHSY-2	337876	5	5q23.3	129268422	-5.54125	0.529202
PHF15	23338	5	5q31.1	133889697	5.20957	1.53043
CXCL14	9547	5	5q31.1	134934274	-28.2307	0.0451263
KLHL3	26249	5	5q31.2	136981088	-16.1413	0.282749
KIF20A	10112	5	5q31.2	137542784	13.5233	12.5377
CDC23	8697	5	5q31.2	137551236	10.3952	7.17557
CDC25C	995	5	5q31.2	137648858	11.8905	4.41746
FAM53C	51307	5	5q31.2	137701867	11.8905	4.41746
EGR1	1958	5	5q31.2	137829080	-7.53689	0.133916
HSPA9	3313	5	5q31.2	137918923	5.89061	1.877
LOC492311	492311	5	5q31.3	139485705	-13.0878	0.237905
SRA1	10011	5	5q31.3	139909837	5.35889	2.08583
WDR55	54853	5	5q31.3	140024568	6.13992	2.25237
DND1	373863	5	5q31.3	140030565	6.13992	2.25237
PCDHB2	56133	5	5q31.3	140454421	-6.09072	0.442278
PCDHB4	56131	5	5q31.3	140481765	-11.05	0.194609
PCDHB5	26167	5	5q31.3	140494984	-10.0193	0.213842
PCDHB7	56129	5	5q31.3	140532427	-5.37491	0.629901
PCDHB16	57717	5	5q31.3	140541164	-6.71493	0.427891
PCDHB10	56126	5	5q31.3	140552136	-7.67255	0.384498
PCDHB12	56124	5	5q31.3	140568475	-9.52924	0.423738
PCDHB14	56122	5	5q31.3	140583262	-5.78866	0.32482
PCDHB18	54660	5	5q31.3	140594120	-7.13957	0.46994
PCDHB15	56121	5	5q31.3	140605331	-6.43567	0.299066
PCDHGA1	56114	5	5q31.3	140690436	-9.93499	0.53265
PCDHGA2	56113	5	5q31.3	140698538	-9.93499	0.53265
PCDHGA3	56112	5	5q31.3	140703785	-9.93499	0.53265
PCDHGB1	56104	5	5q31.3	140710012	-9.93499	0.53265
PCDHGA4	56111	5	5q31.3	140714952	-9.93499	0.53265
PCDHGB2	56103	5	5q31.3	140719887	-9.93499	0.53265
PCDHGA5	56110	5	5q31.3	140724082	-9.93499	0.53265
PCDHGB3	56102	5	5q31.3	140730146	-9.93499	0.53265
PCDHGA6	56109	5	5q31.3	140733835	-9.93499	0.53265
PCDHGA7	56108	5	5q31.3	140742651	-9.93499	0.53265
PCDHGB4	8641	5	5q31.3	140747636	-9.93499	0.53265
PCDHGA8	9708	5	5q31.3	140751667	-9.93499	0.53265
PCDHGB5	56101	5	5q31.3	140757879	-9.93499	0.53265
PCDHGA9	56107	5	5q31.3	140762704	-9.93499	0.53265
PCDHGB6	56100	5	5q31.3	140767954	-9.93499	0.53265
PCDHGA10	56106	5	5q31.3	140772927	-9.93499	0.53265
PCDHGB7	56099	5	5q31.3	140777466	-9.93499	0.53265
PCDHGA11	56105	5	5q31.3	140780721	-9.93499	0.53265
PCDHGA12	26025	5	5q31.3	140790342	-9.93499	0.53265
PCDHGC3	5098	5	5q31.3	140835753	-9.93499	0.53265
PCDHGC4	56098	5	5q31.3	140844925	-9.93499	0.53265
PCDHGC5	56097	5	5q31.3	140848992	-9.93499	0.53265
DIAPH1	1729	5	5q31.3	140874772	6.53647	2.15672
RELL2	285613	5	5q31.3	140996779	5.13403	1.68625
FCHSD1	89848	5	5q31.3	140999053	5.13403	1.68625
ARHGAP26	23092	5	5q31.3	142130476	-6.4938	0.31093
DPYSL3	1809	5	5q32	146750564	-12.7263	0.243331
SPINK5	11005	5	5q33.1	147423759	-6.9402	0.0250707
SPINK7	84651	5	5q33.1	147672183	-8.30792	0.0328541
LOC728264	728264	5	5q33.1	148743536	-14.3919	0.118262
MIRN145	406937	5	5q33.1	148790401	-14.3919	0.118262
TIGD6	81789	5	5q33.1	149352874	5.24521	1.70737
KIAA0194	22993	5	5q33.1	149360047	5.24521	1.70737
CSF1R	1436	5	5q33.1	149413051	-9.50364	0.337657
PDGFRB	5159	5	5q33.1	149473595	-20.1633	0.0797548
TCOF1	6949	5	5q33.1	149717428	5.88923	2.52289
CD74	972	5	5q33.1	149761393	-21.3469	0.0343454
LOC134466	134466	5	5q33.1	150290191	-6.45869	0.49118
GPX3	2878	5	5q33.1	150380192	-13.0923	0.171955
CCDC69	26112	5	5q33.1	150540806	-10.1501	0.249264
GM2A	2760	5	5q33.1	150612837	-5.76864	0.420887
FAT2	2196	5	5q33.1	150863847	-6.82074	0.153424
SPARC	6678	5	5q33.1	151021201	-38.4435	0.0127515
C5orf4	10826	5	5q33.2	154178245	-8.62056	0.266259
MRPL22	29093	5	5q33.2	154300839	7.94819	2.95164
KIF4B	285643	5	5q33.2	154373453	10.743	3.41517
SGCD	6444	5	5q33.3	155686345	-7.27257	0.346493
HAVCR2	84868	5	5q33.3	156445421	-5.83979	0.605279
ITK	3702	5	5q33.3	156540485	-6.34169	0.338463
EBF1	1879	5	5q33.3	158058006	-9.79381	0.226619
WWC1	23286	5	5q35.1	167651670	10.8697	3.15469
LOC345630	345630	5	5q35.1	167889088	7.51722	1.90712
SLIT3	6586	5	5q35.1	168025857	-11.6094	0.265512
DOCK2	1794	5	5q35.1	168996871	-10.3611	0.220796
LCP2	3937	5	5q35.1	169607666	-11.8314	0.264263
GABRP	2568	5	5q35.1	170143343	-6.41306	0.135685
TLX3	30012	5	5q35.1	170668893	5.1965	2.70953
FGF18	8817	5	5q35.1	170779272	5.33477	1.53511
SFXN1	94081	5	5q35.2	174838189	7.85598	2.93486
THOC3	84321	5	5q35.2	175319140	6.27442	2.15239
PCLKC	54825	5	5q35.2	175908971	5.52691	1.58062
GPRIN1	114787	5	5q35.2	175955409	5.89432	2.0012
FGFR4	2264	5	5q35.2	176446527	5.14772	2.53965
LOC728554	728554	5	5q35.3	177234868	6.27442	2.15239
HNRPAB	3182	5	5q35.3	177564114	5.07519	1.67457
MGAT4B	11282	5	5q35.3	179156711	9.03875	3.23337
SQSTM1	8878	5	5q35.3	179180503	8.14474	3.00145
SNORD95	619570	5	5q35.3	180602920	-5.68991	0.360676
OR4F3	26683	5	5q35.3	180726095	-6.87925	0.437164
IRF4	3662	6	6p25.3	336760	-8.33305	0.498696
FOXF2	2295	6	6p25.3	1335068	6.72394	2.86925
NRN1	51299	6	6p25.1	5943231	-10.5241	0.247026
F13A1	2162	6	6p25.1	6089310	-14.1112	0.072502
LY86	9450	6	6p25.1	6533933	-9.0984	0.400913
TFAP2A	7020	6	6p24.3	10504902	7.96729	5.00276
LOC100130275	100130275	6	6p24.3	10522811	9.12358	2.88374
C6orf218	221718	6	6p24.3	10537663	5.40714	3.26053
CCDC90A	63933	6	6p23	13898999	5.95903	1.98989
ATXN1	6310	6	6p22.3	16407322	-6.03132	0.300642
RBM24	221662	6	6p22.3	17390911	-9.46332	0.304757
ID4	3400	6	6p22.3	19945596	-8.86175	0.240404
E2F3	1871	6	6p22.3	20510377	9.37282	2.47753
GMNN	51053	6	6p22.2	24883143	6.83708	4.72076
C6orf32	9750	6	6p22.2	24947566	-10.9838	0.311259
CMAH	8418	6	6p22.2	25189274	-7.79911	0.261968
HIST1H1C	3006	6	6p22.1	26163894	6.21996	3.25225
HIST1H2BG	8339	6	6p22.1	26324407	5.67075	2.13756
HIST1H4G	8369	6	6p22.1	26354818	5.40503	1.76508
HIST1H3G	8355	6	6p22.1	26379125	7.83643	4.0123
HIST1H2BJ	8970	6	6p22.1	27208074	8.44658	3.44449
HIST1H2AG	8969	6	6p22.1	27208800	8.04165	3.236
HIST1H2BK	85236	6	6p22.1	27214052	5.33343	3.95739
HIST1H4I	8294	6	6p22.1	27215067	5.51947	2.71969
HIST1H2AH	85235	6	6p22.1	27222887	5.42536	2.94073
ZNF204	7754	6	6p22.1	27433581	-6.48337	0.167829
HIST1H2AI	8329	6	6p22.1	27883956	6.04653	4.38047
HIST1H3H	8357	6	6p22.1	27885821	6.32046	4.24631
HIST1H2AK	8330	6	6p22.1	27913605	5.27689	3.66594
HIST1H2BN	8341	6	6p22.1	27914343	5.27689	3.66594
HIST1H2AM	8336	6	6p22.1	27968456	7.33661	3.64412
HIST1H2BO	8348	6	6p22.1	27969182	7.36031	3.35143
LOC222699	222699	6	6p22.1	28291095	5.10167	1.70687
GABBR1	2550	6	6p22.1	29677984	-6.85302	0.333813
GNL1	2794	6	6p21.33	30621673	5.44927	1.92829
ABCF1	23	6	6p21.33	30647149	7.85962	2.54646
TUBB	203068	6	6p21.33	30796136	5.45022	2.17079
GTF2H4	2968	6	6p21.33	30983956	5.12427	2.25442
VARS2	57176	6	6p21.33	30989961	5.12427	2.25442
C6orf205	394263	6	6p21.33	31059474	-9.74574	0.0309984
CCHCR1	54535	6	6p21.33	31218195	5.35317	1.88615
MICB	4277	6	6p21.33	31573945	12.8394	5.84024
AIF1	199	6	6p21.33	31691012	-9.63689	0.336271
BAT2	7916	6	6p21.33	31696429	5.30811	2.14616
BAT3	7917	6	6p21.33	31714784	5.68391	2.44378
HSPA1A	3303	6	6p21.33	31891316	6.62808	2.00266
HSPA1B	3304	6	6p21.32	31903503	6.62808	2.00266
C2	717	6	6p21.32	32003473	-5.56807	0.397894
TNXA	7146	6	6p21.32	32084369	-6.04114	0.468086
TNXB	7148	6	6p21.32	32116911	-6.04114	0.468086
FKBPL	63943	6	6p21.32	32204462	5.7891	1.96756
HLA-DRA	3122	6	6p21.32	32515625	-27.6994	0.0186529
HLA-DQA1	3117	6	6p21.32	32713161	-6.03496	0.266191
HLA-DQA2	3118	6	6p21.32	32817141	-6.03496	0.266191
HLA-DMB	3109	6	6p21.32	33010393	-7.62372	0.227735
HLA-DMA	3108	6	6p21.32	33024373	-6.97926	0.26871
HLA-DPA1	3113	6	6p21.32	33140772	-30.1253	0.0189524
HLA-DPB1	3115	6	6p21.32	33151738	-21.3882	0.0776847
DAXX	1616	6	6p21.32	33394367	5.33717	1.98536
KIFC1	3833	6	6p21.32	33467583	6.55644	4.47075
BAK1	578	6	6p21.31	33648301	6.74859	2.99064
C6orf106	64771	6	6p21.31	34663043	7.5922	1.81547
SNRPC	6631	6	6p21.31	34833293	5.94353	2.92081
UHRF1BP1	54887	6	6p21.31	34867772	8.26443	2.38112
FKBP5	2289	6	6p21.31	35649345	-6.74816	0.260028
MAPK13	5603	6	6p21.31	36206240	-7.07381	0.300673
BTBD9	114781	6	6p21.2	38244205	-6.01924	0.352011
DAAM2	23500	6	6p21.2	39868771	-5.67265	0.498701
LOC221442	221442	6	6p21.1	41208063	-6.05758	0.222834
FOXP4	116113	6	6p21.1	41622142	5.73594	1.98226
BYSL	705	6	6p21.1	41996943	6.43973	3.81347
TRERF1	55809	6	6p21.1	42303842	-6.38075	0.334454
KIAA0240	23506	6	6p21.1	42896772	-8.44217	0.556979
C6orf153	88745	6	6p21.1	43097363	6.37437	2.97867
TTBK1	84630	6	6p21.1	43319200	5.46558	1.54374
XPO5	57510	6	6p21.1	43598050	6.36229	2.14568
MAD2L1BP	9587	6	6p21.1	43705257	5.14467	1.66766
CLIC5	53405	6	6p12.3	45974171	-5.92723	0.305905
TDRD6	221400	6	6p12.3	46763825	-6.38953	0.306895
PLA2G7	7941	6	6p12.3	46780237	-6.38953	0.306895
GPR116	221395	6	6p12.3	46928201	-13.7984	0.187427
CRISP3	10321	6	6p12.3	49803048	-17.6595	0.0126779
FTHP1	2509	6	6p12.3	50988102	5.16569	2.04384
MCM3	4172	6	6p12.2	52236771	6.69223	3.57382
GSTA4	2941	6	6p12.1	52950710	-13.6876	0.199157
COL21A1	81578	6	6p12.1	56029347	-13.1565	0.193997
PRIM2	5558	6	6p11.2	57290381	5.73286	2.31883
PTP4A1	7803	6	6q12	64339879	7.49348	2.36147
BAI3	577	6	6q13	69402353	-5.68812	0.605304
LMBRD1	55788	6	6q13	70442470	-5.91348	0.365018
FAM135A	57579	6	6q13	71179828	-5.85389	0.21507
MIRN30A	407029	6	6q13	72169974	5.32491	2.24901
DPPA5	340168	6	6q13	74119508	5.2503	1.62482
C6orf150	115004	6	6q13	74191577	7.17771	3.01975
SH3BGRL2	83699	6	6q14.1	80397719	-15.381	0.0727679
DOPEY1	23033	6	6q14.2	83834104	-7.54349	0.234596
C6orf117	112609	6	6q14.3	84800139	-6.13193	0.477227
KIAA1009	22832	6	6q14.3	84890679	-7.24504	0.352481
NT5E	4907	6	6q14.3	86216528	-6.91238	0.129447
C6orf162	57150	6	6q15	88089025	-6.15139	0.393338
RARS2	57038	6	6q15	88280820	-7.39664	0.477068
RRAGD	58528	6	6q15	90134313	-7.94443	0.127638
ANKRD6	22881	6	6q15	90199616	-6.68821	0.410135
LYRM2	57226	6	6q15	90398664	-6.68821	0.410135
EPHA7	2045	6	6q16.1	94007860	-10.4775	0.257189
KIAA0776	23376	6	6q16.1	97076438	-5.41945	0.27847
FHL5	9457	6	6q16.1	97117156	-9.54552	0.400866
FBXL4	26235	6	6q16.2	99428322	-7.57292	0.366383
SIM1	6492	6	6q16.3	100943471	5.96443	1.67411
PRDM1	639	6	6q21	106640888	-5.75482	0.159114
ARMC2	84071	6	6q21	109276312	-6.55787	0.514758
SESN1	27244	6	6q21	109414338	-5.42811	0.425802
MICAL1	64780	6	6q21	109871958	-7.8492	0.544342
FIG4	9896	6	6q21	110119161	-6.62719	0.483157
CDC40	51362	6	6q21	110608317	-5.9075	0.428475
C6orf186	728464	6	6q21	110673842	-6.83855	0.351156
TUBE1	51175	6	6q21	112498673	-7.15297	0.517282
LOC619208	619208	6	6q21	112515367	-7.15297	0.517282
LAMA4	3910	6	6q21	112535827	-15.3312	0.107328
LOC442249	442249	6	6q21	112789332	7.59872	3.52038
KPNA5	3841	6	6q22.2	117109060	-5.93759	0.340368
PLN	5350	6	6q22.31	118976165	-8.15262	0.305253
MAN1A1	4121	6	6q22.31	119540965	-9.53616	0.207903
C6orf170	221322	6	6q22.31	121442326	-6.3453	0.377346
GJA1	2697	6	6q22.31	121798444	-43.0967	0.0184813
SMPDL3A	10924	6	6q22.31	123152123	-14.3105	0.12872
RNF146	81847	6	6q22.33	127629713	-5.74735	0.386034
KIAA0408	9729	6	6q22.33	127803428	-6.34973	0.597157
C6orf174	387104	6	6q22.33	127813023	-6.34973	0.597157
C6orf190	387357	6	6q22.33	128071038	-7.22723	0.269324
LAMA2	3908	6	6q22.33	129245979	-27.1294	0.0488037
L3MBTL3	84456	6	6q22.33	130381427	-8.93436	0.236991
SAMD3	154075	6	6q23.1	130507153	-6.60537	0.542439
AKAP7	9465	6	6q23.2	131508154	-8.55656	0.369563
ENPP1	5167	6	6q23.2	132170853	-5.51628	0.224089
CTGF	1490	6	6q23.2	132311009	-5.53117	0.319813
MOXD1	26002	6	6q23.2	132658887	-13.1656	0.0969351
STX7	8417	6	6q23.2	132822848	-6.23405	0.35203
FAM54A	113115	6	6q23.3	136593861	7.22143	2.78864
PEX7	5191	6	6q23.3	137185416	-5.98031	0.566269
IL20RA	53832	6	6q23.3	137362801	-6.77858	0.144172
IFNGR1	3459	6	6q23.3	137560315	-6.00333	0.298417
HEBP2	23593	6	6q23.3	138767029	-5.45513	0.341078
FUCA2	2519	6	6q24.2	143857935	8.31643	2.45759
GRM1	2911	6	6q24.3	146392112	6.51288	1.54602
RAB32	10981	6	6q24.3	146906521	7.80444	2.52786
ULBP3	79465	6	6q25.1	150427436	7.54708	2.02314
PLEKHG1	57480	6	6q25.1	150962692	-8.09326	0.263493
MTHFD1L	25902	6	6q25.1	151228384	11.4466	2.99534
C6orf97	80129	6	6q25.1	151856920	-5.77496	0.46685
ESR1	2099	6	6q25.1	152170379	-27.918	0.0616688
SYNE1	23345	6	6q25.1	152484515	-7.22025	0.29942
MYCT1	80177	6	6q25.2	153060723	-9.83638	0.264377
FBXO5	26271	6	6q25.2	153333351	6.87706	2.67316
PIP3-E	26034	6	6q25.2	154517438	-7.3166	0.443268
TAGAP	117289	6	6q25.3	159376012	-6.17746	0.491516
TCP1	6950	6	6q25.3	160119520	5.30701	1.74415
SNORA20	677806	6	6q25.3	160121272	-8.71305	0.227118
BRP44L	51660	6	6q27	166698397	-6.53301	0.374187
C6orf123	26238	6	6q27	167931093	-5.41373	0.649527
LOC441179	441179	6	6q27	167938789	-5.41373	0.649527
SMOC2	64094	6	6q27	168584880	-9.09365	0.217701
THBS2	7058	6	6q27	169357800	-13.0695	0.119319
C6orf70	55780	6	6q27	169893646	-6.30696	0.397535
PDGFA	5154	7	7p22.3	503421	5.80215	2.13257
LOC100132080	100132080	7	7p22.3	506243	5.80215	2.13257
PRKAR1B	5575	7	7p22.3	555913	5.33991	2.72455
FLJ44124	641737	7	7p22.3	850067	-8.22991	0.320759
C7orf20	51608	7	7p22.3	882717	7.6506	1.99125
GPER	2852	7	7p22.3	1092969	5.51378	1.95946
MAFK	7975	7	7p22.3	1536894	8.78342	2.21326
TMEM184A	202915	7	7p22.3	1548397	8.78342	2.21326
MAD1L1	8379	7	7p22.3	1821954	6.25345	1.70811
EIF3B	8662	7	7p22.2	2361000	7.35747	2.63178
WIPI2	26100	7	7p22.1	5196361	7.70169	1.8917
FBXL18	80028	7	7p22.1	5481954	8.59886	1.80376
FSCN1	6624	7	7p22.1	5598980	5.12498	2.95498
EIF2AK1	27102	7	7p22.1	6029988	9.4916	2.33352
DAGLB	221955	7	7p22.1	6415285	6.76148	3.02534
RPA3	6119	7	7p21.3	7643100	11.0676	2.13477
ICA1	3382	7	7p21.3	8119339	-8.252	0.308999
THSD7A	221981	7	7p21.3	11380695	-14.0945	0.261833
ETV1	2115	7	7p21.2	13897379	-5.9223	0.430466
AGR2	10551	7	7p21.1	16797960	-6.56863	0.0467757
HDAC9	9734	7	7p21.1	18501894	-5.7037	0.518913
GPNMB	10457	7	7p15.3	23252841	-7.11832	0.0805797
IGF2BP3	10643	7	7p15.3	23316353	6.77568	5.5301
JAZF1	221895	7	7p15.2	27836717	-6.50796	0.332526
C7orf41	222166	7	7p15.1	30141077	-7.45695	0.303888
GARS	2617	7	7p15.1	30600706	5.36982	2.12342
INMT	11185	7	7p15.1	30758276	-17.6213	0.120485
AQP1	358	7	7p15.1	30917993	-17.6213	0.120485
ADCYAP1R1	117	7	7p15.1	31058667	-6.05364	0.361393
RP9	6100	7	7p14.3	33100934	7.54873	1.90672
ANLN	54443	7	7p14.2	36395957	6.08929	7.95167
AOAH	313	7	7p14.2	36519134	-16.0023	0.0994875
ELMO1	9844	7	7p14.2	36860486	-19.6711	0.113634
GPR141	353345	7	7p14.1	37746521	-7.08139	0.420726
SFRP4	6424	7	7p14.1	37912068	-38.4563	0.00681227
C7orf11	136647	7	7p14.1	40138867	8.7845	2.16387
MRPS24	64951	7	7p13	43872682	6.27221	1.91855
AEBP1	165	7	7p13	44110485	-16.2359	0.141753
IKZF1	10320	7	7p12.2	50411725	-6.34224	0.370221
ZNF713	349075	7	7p11.2	55947825	6.95927	2.13989
MRPS17	51373	7	7p11.2	55987105	6.95927	2.13989
GBAS	2631	7	7p11.2	55999790	6.95927	2.13989
ZNF107	51427	7	7q11.21	63763946	-5.82753	0.396499
ZNF138	7697	7	7q11.21	63892241	-7.65744	0.361678
LOC168474	168474	7	7q11.21	63947506	7.41232	1.66425
ZNF273	10793	7	7q11.21	64001055	-5.79851	0.40968
ZNF117	51351	7	7q11.21	64072265	-11.5543	0.210827
ERV3	2086	7	7q11.21	64088169	-9.73508	0.199375
ASL	435	7	7q11.21	65178211	6.40929	1.6209
AUTS2	26053	7	7q11.22	68702255	-8.68032	0.367371
POM121	9883	7	7q11.23	71987872	5.2954	2.12601
NSUN5C	260294	7	7q11.23	72056768	5.56188	1.67021
NSUN5	55695	7	7q11.23	72355162	7.88269	2.53234
BCL7B	9275	7	7q11.23	72588622	6.19008	1.96499
WBSCR22	114049	7	7q11.23	72735834	6.44988	2.37388
EIF4H	7458	7	7q11.23	73226642	5.77589	1.74946
RFC2	5982	7	7q11.23	73283768	8.42072	3.87573
GTF2IRD1	9569	7	7q11.23	73506056	5.25173	2.14284
GTF2IRD2	84163	7	7q11.23	73848420	-5.61882	0.34874
LOC389523	389523	7	7q11.23	73975505	5.0739	2.00357
GTF2IRD2B	389524	7	7q11.23	74146283	-5.61882	0.34874
LOC729438	729438	7	7q11.23	74645541	5.0739	2.00357
NSUN5B	155400	7	7q11.23	74877582	5.56188	1.67021
LOC100101267	100101267	7	7q11.23	74884001	5.2954	2.12601
YWHAG	7532	7	7q11.23	75794052	8.28363	1.92672
ZP3	7784	7	7q11.23	75864804	5.74667	3.36939
FDPSL2A	619190	7	7q11.23	75937273	6.94452	2.10801
CCDC146	57639	7	7q11.23	76589870	-10.5975	0.169176
FGL2	10875	7	7q11.23	76660624	-11.7387	0.110943
CD36	948	7	7q21.11	80069459	-15.4962	0.18098
HGF	3082	7	7q21.11	81169380	-11.0596	0.316909
PCLO	27445	7	7q21.11	82225378	-7.8102	0.496928
SEMA3E	9723	7	7q21.11	82831158	-6.14553	0.319143
STEAP2	261729	7	7q21.13	89678936	-6.17907	0.193159
COL1A2	1278	7	7q21.3	93861809	-34.4121	0.0184154
PDK4	5166	7	7q21.3	95050745	-5.58933	0.25906
PDAP1	11333	7	7q22.1	98830525	5.82976	1.94765
BUD31	8896	7	7q22.1	98844548	7.48862	2.27015
PTCD1	26024	7	7q22.1	98854681	7.12717	2.26618
ATP5J2	9551	7	7q22.1	98893720	7.3079	2.26816
CYP3A5	1577	7	7q22.1	99083753	-5.44613	0.383753
MCM7	4176	7	7q22.1	99528340	9.22707	4.75239
MIRN25	407014	7	7q22.1	99529118	5.52621	1.67238
MIRN106B	406900	7	7q22.1	99529551	5.73293	1.84359
TAF6	6878	7	7q22.1	99542629	6.00978	2.40829
LOC255374	255374	7	7q22.1	99562253	5.6904	1.54895
GATS	352954	7	7q22.1	99644497	5.0739	2.00357
PCOLCE	5118	7	7q22.1	100037818	-8.95908	0.206924
TFR2	7036	7	7q22.1	100055975	7.77857	2.54451
GNB2	2783	7	7q22.1	100109311	6.44112	2.17739
ARS2	51593	7	7q22.1	100310671	6.47504	2.20417
AP1S1	1174	7	7q22.1	100584406	5.31825	2.97208
PLOD3	8985	7	7q22.1	100635978	8.66369	3.82284
LRWD1	222229	7	7q22.1	101892395	6.96971	2.20092
POLR2J	5439	7	7q22.1	101900552	6.16905	2.21435
LRRC17	10234	7	7q22.1	102340688	-5.65536	0.221556
PUS7	54517	7	7q22.2	104884194	6.68384	2.89193
YBX1P2	646531	7	7q22.2	105009540	5.94831	1.92004
ATXN7L1	222255	7	7q22.2	105188055	-5.83756	0.458567
PIK3CG	5294	7	7q22.3	106293160	-9.09349	0.256642
GPR22	2845	7	7q22.3	106897738	-5.53313	0.520954
CTTNBP2	83992	7	7q31.2	117137941	-8.46959	0.282602
C7orf58	79974	7	7q31.31	120415987	-6.82393	0.160987
AASS	10157	7	7q31.32	121503423	-8.19901	0.173863
CADPS2	93664	7	7q31.32	121745714	-8.26358	0.165866
GCC1	79571	7	7q32.1	127007918	5.21813	1.60495
C7orf54	27099	7	7q32.1	127424798	-6.67539	0.424016
IMPDH1	3614	7	7q32.1	127819567	5.30327	1.98494
TNPO3	23534	7	7q32.1	128382184	6.52464	1.59824
LOC286016	286016	7	7q32.1	128482513	6.42495	1.88444
LOC407835	407835	7	7q32.1	128553561	5.06215	1.74076
SMO	6608	7	7q32.1	128615949	-6.20496	0.522726
FAM40B	57464	7	7q32.1	128861536	6.27788	3.03403
MEST	4232	7	7q32.2	129913282	7.90266	2.88055
CHCHD3	54927	7	7q32.3	132120163	7.2707	2.22741
AKR1B1	231	7	7q33	133777647	9.21046	15.6122
WDR91	29062	7	7q33	134520525	-6.48791	0.505197
PTN	5764	7	7q33	136562628	-18.3028	0.112315
KIAA1549	57670	7	7q34	138166666	6.15795	2.24349
TBXAS1	6916	7	7q34	139175421	-8.4745	0.456673
JHDM1D	80853	7	7q34	139431015	-5.52574	0.212473
DENND2A	27147	7	7q34	139864689	-6.4573	0.466836
KIAA1147	57189	7	7q34	141002997	-6.59948	0.458088
TAS2R4	50832	7	7q34	141124758	-9.63923	0.268244
CASP2	835	7	7q34	142695524	7.32928	2.05716
ZNF777	27153	7	7q36.1	148759387	5.09761	1.77772
LRRC61	65999	7	7q36.1	149651538	7.56791	4.52607
RARRES2	5919	7	7q36.1	149666351	-8.29137	0.245094
REPIN1	29803	7	7q36.1	149696812	6.39998	1.97714
GIMAP8	155038	7	7q36.1	149778895	-9.42601	0.338856
GIMAP7	168537	7	7q36.1	149842878	-14.3254	0.12508
GIMAP4	55303	7	7q36.1	149895391	-14.3649	0.144024
GIMAP6	474344	7	7q36.1	149953396	-10.0436	0.322755
GIMAP2	26157	7	7q36.1	150013727	-12.0367	0.165972
GIMAP5	55340	7	7q36.1	150065384	-16.8575	0.17268
TMEM176B	28959	7	7q36.1	150119308	-8.85167	0.28042
TMEM176A	55365	7	7q36.1	150128787	-12.3872	0.12563
ACCN3	9311	7	7q36.1	150376885	5.11891	1.61983
CDK5	1020	7	7q36.1	150381832	5.58222	2.88537
SLC4A2	6522	7	7q36.1	150387590	5.57423	2.7792
TMUB1	83590	7	7q36.1	150409105	5.69736	1.9813
ABCF2	10061	7	7q36.1	150535856	6.80826	3.08274
MLL3	58508	7	7q36.1	151462943	-5.42903	0.377241
XRCC2	7516	7	7q36.1	151974516	5.53858	3.97864
FLJ16734	641928	7	7q36.2	153092312	-6.18808	0.453786
NCAPG2	54892	7	7q36.3	158116764	7.81133	4.11527
OR4F21	441308	8	8p23.3	106086	-6.58324	0.45863
FLJ45055	644128	8	8p23.3	148344	-5.55938	0.456709
ZNF596	169270	8	8p23.3	172200	-6.21076	0.521548
ERICH1	157697	8	8p23.3	604200	-6.07496	0.570521
CLN8	2055	8	8p23.3	1699277	-7.20422	0.408006
ANGPT2	285	8	8p23.1	6347601	-7.52245	0.41438
DEFB1	1672	8	8p23.1	6715507	-11.8526	0.247181
OR7E125P	389616	8	8p23.1	7083212	-6.49669	0.537266
LOC349196	349196	8	8p23.1	7106384	-10.2778	0.273953
LOC728731	728731	8	8p23.1	7600003	-6.49669	0.537266
CTSB	1508	8	8p23.1	11737442	-9.58551	0.241022
LOC100131581	100131581	8	8p23.1	12480186	-5.59319	0.515381
LONRF1	91694	8	8p23.1	12623777	-9.12417	0.20174
DLC1	10395	8	8p22	12985243	-8.41089	0.363265
TUSC3	7991	8	8p22	15442101	-8.10678	0.130279
MSR1	4481	8	8p22	16009758	-11.608	0.296298
EFHA2	286097	8	8p22	16929119	-10.3153	0.163951
PDGFRL	5157	8	8p22	17478986	-5.83251	0.522566
ASAH1	427	8	8p22	17958214	-5.54818	0.318865
TNFRSF10B	8795	8	8p21.3	22933591	6.65114	2.26865
LOXL2	4017	8	8p21.3	23210355	12.4403	5.84449
ENTPD4	9583	8	8p21.3	23346075	-5.39465	0.557044
STC1	6781	8	8p21.2	23755379	-5.63938	0.202023
ADAM28	10863	8	8p21.2	24207525	-9.09807	0.0931217
CDCA2	157313	8	8p21.2	25372428	9.25554	5.00683
EPHX2	2053	8	8p21.1	27404562	-7.86	0.296249
PBK	55872	8	8p21.1	27723057	5.52689	5.8603
FZD3	7976	8	8p21.1	28407692	-7.30216	0.272062
KIF13B	23303	8	8p21.1	28980714	-7.25924	0.341191
RBPMS	11030	8	8p12	30361486	-5.48541	0.243976
SNORD13	692084	8	8p12	33490535	-7.48274	0.237112
LOC728024	728024	8	8p12	37724011	6.61779	2.25925
GPR124	25960	8	8p12	37773932	-8.29294	0.403081
EIF4EBP1	1978	8	8p12	38007177	5.0913	3.29115
FGFR1	2260	8	8p12	38387813	-9.12769	0.32066
C8orf4	56892	8	8p11.21	40130146	-9.42102	0.123115
SFRP1	6422	8	8p11.21	41238635	-21.4875	0.0475469
GINS4	84296	8	8p11.21	41505903	9.00745	3.82236
MYST3	7994	8	8p11.21	41906154	-7.25415	0.449712
MCM4	4173	8	8q11.21	49036047	8.0274	4.85199
PCMTD1	115294	8	8q11.23	52892700	-6.63411	0.223227
FAM110B	90362	8	8q12.1	59069667	-7.41788	0.45591
CYP7B1	9420	8	8q12.3	65671246	-9.3805	0.271771
C8orf44	56260	8	8q13.1	67751008	-6.862	0.303192
SGK3	23678	8	8q13.1	67787445	-6.862	0.303192
DEPDC2	80243	8	8q13.2	69027157	-15.3559	0.0917462
SULF1	23213	8	8q13.3	70541427	-9.26323	0.152864
NCOA2	10499	8	8q13.3	71186821	-5.37208	0.425285
EYA1	2138	8	8q13.3	72272222	-7.2366	0.217934
LY96	23643	8	8q21.11	75066144	-5.8211	0.532393
PI15	51050	8	8q21.11	75899327	-6.2733	0.0924163
CRISPLD1	83690	8	8q21.11	76059531	-8.871	0.366166
ZFHX4	79776	8	8q21.11	77756070	-7.51598	0.288682
C8orf70	51101	8	8q21.12	79740885	-5.7953	0.200865
IL7	3574	8	8q21.12	79807560	-11.4072	0.352049
STMN2	11075	8	8q21.13	80685935	-6.18088	0.443247
ZNF704	619279	8	8q21.13	81713324	-9.96824	0.197055
PAG1	55824	8	8q21.13	82042600	-8.17099	0.389705
FABP5	2171	8	8q21.13	82355340	-7.92315	0.0251331
SNX16	64089	8	8q21.13	82874373	-5.941	0.355793
LRRCC1	85444	8	8q21.2	86206629	-6.05791	0.326113
CA13	377677	8	8q21.2	86345259	-5.83877	0.410822
CPNE3	8895	8	8q21.3	87595788	-6.50811	0.462167
MMP16	4325	8	8q21.3	89118576	-7.21884	0.42999
RUNX1T1	862	8	8q21.3	93040328	-16.0282	0.169016
TP53INP1	94241	8	8q22.1	96007377	-7.71745	0.196784
C8orf38	137682	8	8q22.1	96106397	5.37929	1.57019
SDC2	6383	8	8q22.1	97575058	-8.25195	0.194602
PGCP	10404	8	8q22.1	97726675	-19.496	0.123894
TSPYL5	85453	8	8q22.1	98354890	-13.2215	0.17139
LAPTM4B	55353	8	8q22.1	98856985	8.7746	2.49769
NPAL2	79815	8	8q22.2	99273563	-14.7382	0.125458
VPS13B	157680	8	8q22.2	100094670	-5.67244	0.327958
RGS22	26166	8	8q22.2	101042452	-11.9128	0.318293
ZNF706	51123	8	8q22.3	102278442	-7.66899	0.243081
ZFPM2	23414	8	8q23.1	106400323	-9.8541	0.26263
TRPS1	7227	8	8q23.3	116489900	-8.11906	0.0808277
ENPP2	5168	8	8q24.12	120638500	-13.3022	0.0760381
DEPDC6	64798	8	8q24.12	120955146	-8.22252	0.114323
COL14A1	7373	8	8q24.12	121206533	-14.9437	0.0526434
MTSS1	9788	8	8q24.13	125632206	-6.59625	0.278184
LRRC6	23639	8	8q24.22	133653629	-8.57467	0.27299
TMEM71	137835	8	8q24.22	133791376	-8.82053	0.329235
SLA	6503	8	8q24.22	134118155	-5.66869	0.410222
WISP1	8840	8	8q24.22	134272494	-5.87687	0.563152
CHRAC1	54108	8	8q24.3	141590586	6.54032	1.80712
EIF2C2	27161	8	8q24.3	141610446	5.37861	1.95994
LY6K	54742	8	8q24.3	143778533	10.8042	8.00179
C8orf55	51337	8	8q24.3	143805623	5.852	1.79409
ZC3H3	23144	8	8q24.3	144590968	6.337	2.25146
LOC100130274	100130274	8	8q24.3	144860852	5.85731	1.86484
PUF60	22827	8	8q24.3	144970535	8.75902	2.47194
CYC1	1537	8	8q24.3	145221948	6.26753	2.82406
MAF1	84232	8	8q24.3	145231293	5.6955	2.51964
SCXB	642658	8	8q24.3	145393505	6.34444	1.81478
LOC100129885	100129885	8	8q24.3	145461347	6.34444	1.81478
HSF1	3297	8	8q24.3	145486078	5.42711	1.94219
GPR172A	79581	8	8q24.3	145553033	6.27714	3.14102
NFKBIL2	4796	8	8q24.3	145624984	7.28649	2.22165
CYHR1	50626	8	8q24.3	145660016	5.78497	2.81868
PPP1R16A	84988	8	8q24.3	145692917	6.23096	1.92047
MFSD3	113655	8	8q24.3	145705360	7.35223	2.48482
RECQL4	9401	8	8q24.3	145707479	7.93198	2.40986
KIAA1688	80728	8	8q24.3	145725371	5.32813	1.75906
RPL8	6132	8	8q24.3	145985958	5.14719	1.67722
C8orf33	65265	8	8q24.3	146248630	6.18633	3.43188
SMARCA2	6595	9	9p24.3	2005342	-6.82546	0.400003
RFX3	5991	9	9p24.2	3214645	-8.93124	0.371908
GLIS3	169792	9	9p24.2	3814128	-6.11161	0.299886
KIAA2026	158358	9	9p24.1	5909008	-7.93248	0.217281
IL33	90865	9	9p24.1	6231678	-12.5197	0.190032
JMJD2C	23081	9	9p24.1	6747654	-7.0149	0.333811
PTPRD	5789	9	9p24.1	8304246	-6.01801	0.291548
ZDHHC21	340481	9	9p22.3	14607028	-5.43238	0.139296
FREM1	158326	9	9p22.3	14727150	-7.80779	0.405595
C9orf52	158219	9	9p22.3	15161561	-10.5199	0.175726
MGC24103	158295	9	9p22.3	16517183	-8.95507	0.334724
ADAMTSL1	92949	9	9p22.1	18464104	-9.13209	0.431916
DENND4C	55667	9	9p22.1	19280749	-5.83879	0.316332
LOC392288	392288	9	9p22.1	19450924	5.57997	1.52987
KIAA1797	54914	9	9p21.3	20648309	-19.9702	0.0870448
PTPLAD2	401494	9	9p21.3	20996365	-19.9702	0.0870448
CDKN2A	1029	9	9p21.3	21957751	20.1746	10.996
IFT74	80173	9	9p21.2	26937037	-5.40091	0.359076
TEK	7010	9	9p21.2	27099286	-13.2621	0.192876
C9orf72	203228	9	9p21.2	27536544	-5.63057	0.410604
ANKRD18B	441459	9	9p13.3	33513927	5.12117	2.63177
KIF24	347240	9	9p13.3	34242378	7.20197	2.21753
C9orf131	138724	9	9p13.3	35031102	-5.37384	0.551137
FANCG	2189	9	9p13.3	35063835	5.15757	2.79265
CCDC107	203260	9	9p13.3	35648311	7.3567	2.21234
C9orf100	84904	9	9p13.3	35649341	7.3567	2.21234
NPR2	4882	9	9p13.3	35782406	-9.53493	0.392631
RECK	8434	9	9p13.3	36026906	-7.58539	0.393707
C9orf19	152007	9	9p13.3	36126742	-8.11254	0.262524
MELK	9833	9	9p13.2	36562905	7.89209	6.64662
RAB1C	441400	9	9p13.2	37626585	8.80261	2.82202
KGFLP2	654466	9	9p12	41948802	-7.65403	0.26777
ANKRD20A2	441430	9	9p12	42358299	-5.53709	0.459764
LOC100133034	100133034	9	9p11.2	42733173	-5.88146	0.273427
ANKRD20A3	441425	9	9p11.2	43079968	-5.53709	0.459764
KGFLP1	387628	9	9p11.2	46527562	-7.65403	0.26777
FLJ20444	403323	9	9q12	66263518	-6.50698	0.482727
LOC100131997	100131997	9	9q12	67374675	6.15863	1.98038
ANKRD20A1	84210	9	9q12	67516581	-5.53709	0.459764
PGM5P2	595135	9	9q12	68370060	-7.38034	0.405248
ANKRD20A4	728747	9	9q12	68671801	-5.53709	0.459764
LOC100132426	100132426	9	9q12	69634062	-5.88146	0.273427
PGM5	5239	9	9q13	70161635	-7.62865	0.399745
FAM122A	116224	9	9q21.11	70584784	-6.20244	0.379581
ALDH1A1	216	9	9q21.13	74705407	-25.5986	0.0295115
RORB	6096	9	9q21.13	76302072	-7.97929	0.150969
PRUNE2	158471	9	9q21.13	78627991	-6.17679	0.426247
PSAT1	29968	9	9q21.2	80101879	7.84498	5.9884
SHC3	53358	9	9q22.1	90817880	-12.1006	0.2344
CKS2	1164	9	9q22.2	91115933	8.94579	7.64391
SYK	6850	9	9q22.2	92603891	-10.8343	0.257862
OGN	4969	9	9q22.31	94186070	-9.54956	0.116612
OMD	4958	9	9q22.31	94216359	-7.72663	0.353328
ASPN	54829	9	9q22.31	94258308	-9.3707	0.0964075
ECM2	1842	9	9q22.31	94297420	-12.5768	0.260969
NINJ1	4814	9	9q22.31	94923592	6.24725	1.92392
C9orf3	84909	9	9q22.32	96528815	-7.6246	0.405038
MIRN23B	407011	9	9q22.32	96887310	-7.23884	0.333641
MIRN27B	407019	9	9q22.32	96887547	-10.4711	0.179251
MIRN24-1	407012	9	9q22.32	96888123	-6.9198	0.465918
FANCC	2176	9	9q22.32	96901157	6.28712	2.38582
PTCH1	5727	9	9q22.32	97245085	-5.71914	0.260755
SLC35D2	11046	9	9q22.32	98122809	-5.45632	0.533029
ZNF367	195828	9	9q22.32	98190057	6.27812	3.48671
C9orf21	195827	9	9q22.33	98443354	7.11727	1.93966
TMOD1	7111	9	9q22.33	99326258	-8.35873	0.422557
C9orf97	158427	9	9q22.33	99402183	-8.35873	0.422557
COL15A1	1306	9	9q22.33	100745959	-7.23384	0.373551
C9orf30	91283	9	9q31.1	102229463	5.05574	2.11081
TMEFF1	8577	9	9q31.1	102275538	5.05574	2.11081
ABCA1	19	9	9q31.1	106583104	-10.9085	0.171041
ZNF462	58499	9	9q31.2	108665199	-8.2239	0.250451
MIRN32	407036	9	9q31.3	110848329	-7.80215	0.381169
ZNF483	158399	9	9q31.3	113327260	-7.62871	0.196579
PRPF4	9128	9	9q32	115077795	5.41974	2.25741
BSPRY	54836	9	9q32	115151633	-7.68585	0.438523
POLE3	54107	9	9q32	115209342	6.1219	2.19202
DFNB31	25861	9	9q32	116204181	10.6836	1.9942
LOC389787	389787	9	9q33.1	119884792	-7.07927	0.477257
PHF19	26147	9	9q33.2	122657752	7.88159	2.66755
GSN	2934	9	9q33.2	123070201	-13.7576	0.265136
GGTA1	2681	9	9q33.2	123257140	-9.50375	0.281138
GPR21	2844	9	9q33.2	124836667	-5.60407	0.369572
LHX2	9355	9	9q33.3	125813710	7.3184	2.24352
PSMB7	5695	9	9q33.3	126155565	6.63538	2.01682
ANGPTL2	23452	9	9q33.3	128889449	-10.6445	0.222757
GARNL3	84253	9	9q33.3	129066967	-11.0702	0.35587
DPM2	8818	9	9q34.11	129737203	7.31478	2.13688
CIZ1	25792	9	9q34.11	129968165	6.53938	1.89879
C9orf119	375757	9	9q34.11	130078246	8.02789	2.3746
GLE1	2733	9	9q34.11	130306792	6.75459	1.8166
ZER1	10444	9	9q34.11	130531886	5.63118	1.73904
CCBL1	883	9	9q34.11	130635213	6.08675	2.02798
DOLPP1	57171	9	9q34.11	130883227	6.97637	2.06874
C9orf32	28989	9	9q34.11	131428256	5.28824	2.77363
ASB6	140459	9	9q34.11	131436704	5.23977	2.53176
PTGES	9536	9	9q34.11	131540433	7.49281	3.58163
SNORD62A	26786	9	9q34.13	133350873	-5.63254	0.611218
DDX31	64794	9	9q34.13	134459497	8.88045	2.05197
GTF3C4	9329	9	9q34.13	134535549	9.35898	2.12308
GTF3C5	9328	9	9q34.2	134895934	7.68908	2.47018
SURF2	6835	9	9q34.2	135213249	5.30095	1.93244
SURF4	6836	9	9q34.2	135218161	5.85201	1.75165
VAV2	7410	9	9q34.2	135616837	6.67163	2.17582
WDR5	11091	9	9q34.2	135991031	7.69113	2.37762
MRPS2	51116	9	9q34.3	137532375	5.65326	2.62392
UBAC1	10422	9	9q34.3	137964636	6.26314	1.77373
BTBD14A	138151	9	9q34.3	138043023	5.37812	1.67539
QSOX2	169714	9	9q34.3	138238000	9.61855	3.37336
GPSM1	26086	9	9q34.3	138348726	5.83517	1.54201
SNAPC4	6621	9	9q34.3	138389850	5.37562	1.6435
SDCCAG3	10807	9	9q34.3	138416195	5.95856	2.67858
PMPCA	23203	9	9q34.3	138424937	6.51136	2.89433
PTGDS	5730	9	9q34.3	138991777	-8.35853	0.320355
MAN1B1	11253	9	9q34.3	139101200	5.93248	1.85416
ANAPC2	29882	9	9q34.3	139189057	5.31208	1.77716
C9orf75	286262	9	9q34.3	139205890	5.72866	2.10277
NDOR1	27158	9	9q34.3	139220004	5.15087	1.83879
COBRA1	25920	9	9q34.3	139269768	5.77447	2.37621
NELF	26012	9	9q34.3	139462498	5.61344	2.73432
WDR85	92715	9	9q34.3	139569182	5.72549	1.90357
ZMYND19	116225	9	9q34.3	139596352	6.91709	2.09527
C9orf37	85026	9	9q34.3	139629610	7.49455	2.27471
DIP2C	22982	10	10p15.3	311432	-7.6516	0.416396
PFKP	5214	10	10p15.2	3099752	5.06699	2.45809
KLF6	1316	10	10p15.1	3811234	-5.55189	0.35152
ITIH5	80760	10	10p14	7641641	-5.90683	0.566585
CUGBP2	10659	10	10p14	11087265	-8.09423	0.279953
DHTKD1	55526	10	10p14	12150940	5.96374	2.07315
CCDC3	83643	10	10p13	12978631	-12.5269	0.202806
MCM10	55388	10	10p13	13243587	8.54853	5.05399
SEPHS1	22929	10	10p13	13400086	8.93667	2.09808
FRMD4A	55691	10	10p13	13725712	-5.63039	0.606232
C10orf111	221060	10	10p13	15177390	7.7008	1.69801
ITGA8	8516	10	10p13	15599094	-18.4767	0.0495738
C10orf97	80013	10	10p13	15860181	-5.57889	0.429655
CUBN	8029	10	10p13	16905971	-6.1137	0.447676
PTPLA	9200	10	10p12.33	17671964	7.51565	2.3622
MRC1L1	414308	10	10p12.33	17891368	-12.3759	0.115693
MRC1	4360	10	10p12.33	18138358	-12.3759	0.115693
PLXDC2	84898	10	10p12.31	20145378	-20.3243	0.0705546
PIP4K2A	5305	10	10p12.2	22863772	-7.6989	0.521528
KIAA1217	56243	10	10p12.1	24023681	-11.7072	0.313849
MASTL	84930	10	10p12.1	27484298	6.24542	2.7816
ZNF438	220929	10	10p11.23	31173569	-5.69975	0.571659
ZEB1	6935	10	10p11.22	31648148	-8.91607	0.190124
EPC1	80314	10	10p11.22	32597865	-6.66807	0.471098
CCDC7	221016	10	10p11.22	32775047	-6.4069	0.442852
C10orf68	79741	10	10p11.22	32896657	-6.4069	0.442852
NRP1	8829	10	10p11.22	33506432	-12.2258	0.259293
GJD4	219770	10	10p11.21	35934344	5.12347	1.51858
ZNF248	57209	10	10p11.21	38157905	-6.69655	0.324335
ZNF25	219749	10	10p11.21	38278801	-8.68147	0.317618
HNRPF	3185	10	10q11.21	43201071	6.29332	1.78401
CXCL12	6387	10	10q11.21	44185611	-14.0175	0.0665784
ALOX5	240	10	10q11.21	45189635	-8.6874	0.381486
ANUBL1	93550	10	10q11.21	45431049	-5.97864	0.345032
CTGLF1	119016	10	10q11.21	45641056	-7.74966	0.500399
LOC100132929	100132929	10	10q11.22	46597208	-6.15024	0.251607
LOC100133093	100133093	10	10q11.22	47867658	-6.15024	0.251607
LOC644054	644054	10	10q11.22	48873359	-6.15024	0.251607
WDFY4	57705	10	10q11.22	49638068	-6.4382	0.491006
C10orf72	196740	10	10q11.22	49896258	-7.46757	0.32622
CTGLF4	653268	10	10q11.23	51134168	-7.74966	0.500399
PRKG1	5592	10	10q21.1	52420951	-10.4594	0.164211
ZWINT	11130	10	10q21.1	57787205	8.0245	3.72145
PHYHIPL	84457	10	10q21.1	60606353	-14.8518	0.344174
FAM13C1	220965	10	10q21.1	60675899	-14.8518	0.344174
SLC16A9	220963	10	10q21.1	61080529	-17.4233	0.201659
ANK3	288	10	10q21.2	61458165	-10.717	0.205765
CDC2	983	10	10q21.2	62205690	6.7053	6.46716
TMEM26	219623	10	10q21.2	62836414	-6.89608	0.514472
JMJD1C	221037	10	10q21.2	64596991	5.28509	1.648
MYPN	84665	10	10q21.3	69539256	7.0566	13.9163
DNA2	1763	10	10q21.3	69843827	5.09719	2.63766
CXXC6	80312	10	10q21.3	69990123	-8.5248	0.389718
SUPV3L1	6832	10	10q21.3	70609999	7.57299	2.34466
AIFM2	84883	10	10q22.1	71542036	6.60086	2.29627
PRF1	5551	10	10q22.1	72027110	-6.35163	0.527286
CCDC109A	90550	10	10q22.1	74121895	7.15663	2.14535
PPP3CB	5532	10	10q22.2	74866618	-8.74373	0.492037
USP54	159195	10	10q22.2	74927302	-6.43193	0.454657
CTGLF2	729092	10	10q22.2	75104037	-7.74966	0.500399
MYST4	23522	10	10q22.2	76256385	-9.01986	0.322324
KCNMA1	3778	10	10q22.3	78299366	-5.95678	0.290902
C10orf57	80195	10	10q22.3	81828406	-8.08566	0.287145
C10orf58	84293	10	10q23.1	82158222	-6.16336	0.230351
KIAA1975	119385	10	10q23.2	88720478	-7.74966	0.500399
FAM25A	643161	10	10q23.2	88770026	-6.15024	0.251607
ANKRD22	118932	10	10q23.31	90569636	-9.28731	0.0713255
ACTA2	59	10	10q23.31	90684811	-10.4634	0.0847345
LOC119358	119358	10	10q23.31	91728454	5.94069	2.18849
RPP30	10556	10	10q23.31	92621689	6.3031	1.65378
ANKRD1	27063	10	10q23.31	92661837	5.42459	2.7162
KIF11	3832	10	10q23.33	94342971	5.6213	4.78808
CEP55	55165	10	10q23.33	95246399	6.57043	7.71684
C10orf4	118924	10	10q23.33	95418319	-5.96828	0.4706
SORBS1	10580	10	10q23.33	97061520	-6.93558	0.328104
ENTPD1	953	10	10q23.33	97461526	-15.5375	0.138906
BLNK	29760	10	10q24.1	97941445	-7.46025	0.252238
ZDHHC16	84287	10	10q24.1	99195920	5.05819	2.25496
ANKRD2	26287	10	10q24.1	99322246	5.41582	2.1042
PI4K2A	55361	10	10q24.2	99390433	5.24101	2.31228
AVPI1	60370	10	10q24.2	99427171	9.7583	6.46793
HPSE2	60495	10	10q24.2	100208867	-16.6791	0.142136
SCD	6319	10	10q24.31	102096762	6.45934	3.83378
C10orf2	56652	10	10q24.31	102737302	7.75576	3.16239
TLX1	3195	10	10q24.31	102880252	5.33145	1.75352
LBX1	10660	10	10q24.31	102976723	5.30449	1.63585
PPRC1	23082	10	10q24.32	103882777	5.71979	2.19859
NOLC1	9221	10	10q24.32	103901923	5.71158	2.37649
NFKB2	4791	10	10q24.32	104144219	6.58047	2.84855
FBXL15	79176	10	10q24.32	104169579	5.4023	1.69025
C10orf32	119032	10	10q24.32	104604009	-6.81427	0.365174
AS3MT	57412	10	10q24.32	104619200	-6.81427	0.365174
CNNM2	54805	10	10q24.32	104668104	6.1052	1.99903
ADRA2A	150	10	10q25.2	112826911	-5.61885	0.333316
SLC18A2	6571	10	10q25.3	118990706	-12.2677	0.0944578
FGFR2	2263	10	10q26.13	123227845	-5.56732	0.1741
HMX3	340784	10	10q26.13	124885557	6.39658	1.85294
BUB3	9184	10	10q26.13	124903860	6.86763	2.00028
ALDOAP2	228	10	10q26.13	127344579	5.56004	2.0468
MKI67	4288	10	10q26.2	129784913	7.28011	5.65785
PSMD13	5719	11	11p15.5	226808	5.098	1.71872
PTDSS2	81490	11	11p15.5	440280	6.06157	2.03984
LRRC56	115399	11	11p15.5	527527	7.03524	1.5878
C11orf35	256329	11	11p15.5	544857	7.03524	1.5878
DEAF1	10522	11	11p15.5	634225	5.20481	1.69996
PNPLA2	57104	11	11p15.5	808902	5.88961	2.02371
CD151	977	11	11p15.5	822952	5.76227	2.22068
TSPAN4	7106	11	11p15.5	832824	5.51613	2.2808
DUSP8	1850	11	11p15.5	1531857	7.40472	2.07404
LSP1	4046	11	11p15.5	1830776	-5.52483	0.646115
IGF2	3481	11	11p15.5	2106923	-10.9534	0.225792
INS-IGF2	723961	11	11p15.5	2106926	-10.9534	0.225792
TSSC4	10078	11	11p15.5	2380099	6.79123	1.9258
SNORA54	677833	11	11p15.4	2941577	-6.43008	0.471261
NUP98	4928	11	11p15.4	3652816	5.4349	1.82213
HBB	3043	11	11p15.4	5203272	-8.47057	0.264714
OR52H1	390067	11	11p15.4	5522367	-6.28025	0.504427
TRIM22	10346	11	11p15.4	5667495	-12.0354	0.106078
DCHS1	8642	11	11p15.4	6599134	-6.61586	0.556774
PPFIBP2	8495	11	11p15.4	7491626	-7.62101	0.387334
CYB5R2	51700	11	11p15.4	7642902	-8.17069	0.34869
RIC3	79608	11	11p15.4	8087071	-5.40883	0.572463
STK33	65975	11	11p15.4	8369994	-6.45163	0.410742
TMEM9B	56674	11	11p15.4	8925416	-6.11677	0.504004
SCUBE2	57758	11	11p15.4	8998511	-8.92257	0.327041
RNF141	50862	11	11p15.4	10489801	-9.12174	0.428257
LYVE1	10894	11	11p15.4	10535989	-16.7956	0.132515
MRVI1	10335	11	11p15.4	10551214	-7.99526	0.352108
SPON1	10418	11	11p15.2	13940490	-15.9351	0.126363
DKFZp686O24166	374383	11	11p15.1	17328796	5.09873	3.44435
USH1C	10083	11	11p15.1	17472018	7.19432	1.77625
HTATIP2	10553	11	11p15.1	20341807	5.94096	2.08695
KIF18A	81930	11	11p14.1	27998739	5.05633	5.34271
MPPED2	744	11	11p14.1	30388347	-13.172	0.0706571
CAT	847	11	11p13	34417054	-5.96611	0.387356
DKFZP586H2123	25891	11	11p13	35409950	-21.3807	0.0620634
LRRC4C	57689	11	11p12	40092329	-5.61271	0.551417
ZNF408	79797	11	11p11.2	46678944	5.13762	1.7833
CKAP5	9793	11	11p11.2	46721660	5.99136	2.32037
PTPMT1	114971	11	11p11.2	47543705	6.71094	1.95061
OR7E5P	219445	11	11q11	55503280	-6.81495	0.573382
SSRP1	6749	11	11q12.1	56850035	1.33407	1.61152
SERPING1	710	11	11q12.1	57121603	-16.4973	0.0747592
CLP1	10978	11	11q12.1	57181206	6.32305	1.73616
MPEG1	219972	11	11q12.1	58732559	-11.4475	0.215387
MS4A2	2206	11	11q12.1	59612713	-8.16462	0.25403
MS4A6A	64231	11	11q12.2	59695656	-13.1339	0.187193
MS4A4A	51338	11	11q12.2	59804715	-5.91696	0.361719
MS4A7	58475	11	11q12.2	59902534	-10.5258	0.364912
NYD-SP21	84689	11	11q12.2	59920063	-10.5258	0.364912
CCDC86	79080	11	11q12.2	60366005	6.69191	3.98146
TMEM132A	54972	11	11q12.2	60448489	-5.39398	0.461781
SLC15A3	51296	11	11q12.2	60461134	-5.39398	0.461781
FEN1	2237	11	11q12.2	61316726	7.75346	3.72552
FADS1	3992	11	11q12.2	61323679	12.6025	4.34693
FADS3	3995	11	11q12.2	61397574	8.38492	3.18028
INCENP	3619	11	11q12.3	61648021	7.20586	2.43752
AHNAK	79026	11	11q12.3	61957592	-11.7878	0.413828
B3GAT3	26229	11	11q12.3	62139344	6.05001	2.32827
GANAB	23193	11	11q12.3	62148874	6.94401	2.0982
TAF6L	10629	11	11q12.3	62295451	7.27591	1.69221
WDR74	54663	11	11q12.3	62356960	8.18097	2.87527
SLC3A2	6520	11	11q12.3	62380094	13.1638	4.71684
SLC22A8	9376	11	11q12.3	62516872	6.81152	1.69685
LOC144097	144097	11	11q13.1	63337499	6.29508	2.134
OTUB1	55611	11	11q13.1	63509901	6.35047	1.62045
STIP1	10963	11	11q13.1	63710163	9.32807	2.47065
FERMT3	83706	11	11q13.1	63730782	-7.34904	0.500648
PPP1R14B	26472	11	11q13.1	63768527	5.94386	2.84884
PLCB3	5331	11	11q13.1	63775698	6.07484	1.92657
EHD1	10938	11	11q13.1	64376784	6.82589	2.02551
ARL2	402	11	11q13.1	64538162	6.75643	2.24675
SNX15	29907	11	11q13.1	64551486	6.75643	2.24675
CDCA5	113130	11	11q13.1	64601503	14.0425	6.81061
ZNHIT2	741	11	11q13.1	64640451	5.6673	1.84321
MRPL49	740	11	11q13.1	64646304	5.84894	1.92389
POLA2	23649	11	11q13.1	64786006	5.74435	2.63978
CDC42EP2	10435	11	11q13.1	64838907	6.38772	1.91705
LTBP3	4054	11	11q13.1	65062850	-5.48184	0.455975
HTATIP	10524	11	11q13.1	65236065	5.30543	1.86978
RNASEH2C	84153	11	11q13.1	65241720	5.30543	1.86978
DKFZp761E198	91056	11	11q13.1	65299949	5.37529	1.71769
CFL1	1072	11	11q13.1	65378858	6.00586	1.95453
EFEMP2	30008	11	11q13.1	65390488	-10.1013	0.312738
SART1	9092	11	11q13.1	65485736	6.32287	2.29256
SF3B2	10992	11	11q13.1	65576392	6.30144	1.80793
KLC2	64837	11	11q13.1	65781824	7.06822	2.21175
CD248	57124	11	11q13.1	65838534	-9.49514	0.237322
ACTN3	89	11	11q13.1	66070967	5.12081	1.63558
RBM14	10432	11	11q13.1	66140673	7.45312	2.44402
RBM4	5936	11	11q13.1	66162714	7.45312	2.44402
PC	5091	11	11q13.1	66372573	5.24901	3.6345
LRFN4	78999	11	11q13.1	66381549	6.48646	2.62321
FLJ22675	254439	11	11q13.1	66499330	5.28633	1.97643
SYT12	91683	11	11q13.1	66547467	6.08423	2.46816
CLCF1	23529	11	11q13.1	66888215	5.58522	1.58841
PPP1CA	5499	11	11q13.1	66922228	5.38987	2.03974
PITPNM1	9600	11	11q13.1	67015815	9.4401	2.39817
ALDH3B2	222	11	11q13.2	67186209	-7.1129	0.449324
LOC645332	645332	11	11q13.2	67315816	5.3151	1.62342
NDUFS8	4728	11	11q13.2	67554685	6.92577	2.43359
IGHMBP2	3508	11	11q13.2	68427895	7.61307	1.60919
TMEM16A	55107	11	11q13.3	69602294	-8.54243	0.315797
DHCR7	1717	11	11q13.4	70823105	9.69285	4.13225
OR7E87P	8586	11	11q13.4	70982352	-6.51287	0.530617
LRRC51	220074	11	11q13.4	71469553	5.12036	2.514
C11orf51	25906	11	11q13.4	71498281	5.12036	2.514
FOLR2	2350	11	11q13.4	71605488	-7.31725	0.442046
CLPB	81570	11	11q13.4	71681117	6.01293	2.78697
RELT	84957	11	11q13.4	72765053	5.79285	1.68611
MRPL48	51642	11	11q13.4	73176009	6.87254	1.97029
C2CD3	26005	11	11q13.4	73423128	6.30795	2.51396
SPCS2	9789	11	11q13.4	74337981	-6.09065	0.527651
SLCO2B1	11309	11	11q13.4	74539811	-11.966	0.411767
FLJ33790	283212	11	11q13.4	74811086	5.42835	1.7267
LRRC32	2615	11	11q13.5	76046222	-6.32954	0.516528
ODZ4	26011	11	11q14.1	78041976	-7.13535	0.576078
C11orf82	220042	11	11q14.1	82290417	8.37044	2.9429
FZD4	8322	11	11q14.2	86334369	-6.54358	0.428494
NOX4	50507	11	11q14.3	88699160	-6.18053	0.399779
NAALAD2	10003	11	11q14.3	89507530	-9.48407	0.329371
MTNR1B	4544	11	11q21	92342437	6.28296	1.66244
SESN3	143686	11	11q21	94545781	-10.3174	0.0897701
LOC100131541	100131541	11	11q21	95627221	-8.52479	0.253263
PGR	5241	11	11q22.1	100414313	-14.226	0.0721363
TRPC6	7225	11	11q22.1	100827584	-8.05217	0.223272
DCUN1D5	84259	11	11q22.3	102438031	7.55711	3.0918
PDGFD	80310	11	11q22.3	103283124	-13.8731	0.0932606
CASP1	834	11	11q22.3	104401445	-6.08874	0.323362
KBTBD3	143879	11	11q22.3	105427035	-6.03834	0.527489
EXPH5	23086	11	11q22.3	107884886	-6.59328	0.348584
ARHGAP20	57569	11	11q22.3	109952976	-7.71253	0.418737
LAYN	143903	11	11q23.1	110916443	-7.51813	0.385872
LOC100132686	100132686	11	11q23.1	111636197	-5.95895	0.530888
ZBTB16	7704	11	11q23.2	113435641	-8.03547	0.412322
ZNF259	8882	11	11q23.3	116154486	5.52876	1.8723
TAGLN	6876	11	11q23.3	116575250	-13.2986	0.115714
PCSK7	9159	11	11q23.3	116580998	-13.2986	0.115714
FXYD6	53826	11	11q23.3	117212903	-8.7917	0.418276
IL10RA	3587	11	11q23.3	117362319	-8.28771	0.290268
AMICA1	120425	11	11q23.3	117569652	-8.64443	0.205989
MPZL2	10205	11	11q23.3	117629344	-6.83734	0.232361
CD3E	916	11	11q23.3	117680662	-5.47436	0.403869
CD3G	917	11	11q23.3	117720311	-6.04165	0.294405
HMBS	3145	11	11q23.3	118460797	5.52966	3.09271
H2AFX	3014	11	11q23.3	118469794	7.24068	2.57454
MCAM	4162	11	11q23.3	118684444	6.05971	3.89891
RNF26	79102	11	11q23.3	118710447	6.11544	2.0721
THY1	7070	11	11q23.3	118794098	-9.55341	0.189128
SORL1	6653	11	11q24.1	120828130	-6.09021	0.160481
CHEK1	1111	11	11q24.2	125001547	6.52286	3.94835
FLI1	2313	11	11q24.3	128069199	-11.7442	0.2076
RICS	9743	11	11q24.3	128343052	-8.85899	0.346841
TMEM45B	120224	11	11q24.3	129190951	-5.75836	0.166776
JAM3	83700	11	11q25	133444030	-17.8701	0.241103
NCAPD3	23310	11	11q25	133527547	7.74899	3.27346
B4GALNT3	283358	12	12p13.33	439804	-6.36343	0.557999
CACNA1C	775	12	12p13.33	2032725	-10.2243	0.422476
FOXM1	2305	12	12p13.33	2837110	11.1119	12.4434
TEAD4	7004	12	12p13.33	2938757	6.23185	3.15954
PARP11	57097	12	12p13.32	3788288	-10.2085	0.288259
CCND2	894	12	12p13.32	4253199	-8.29537	0.092748
RAD51AP1	10635	12	12p13.32	4518317	5.14465	3.06954
VWF	7450	12	12p13.31	5928301	-15.898	0.153776
SCNN1A	6337	12	12p13.31	6326274	-8.12858	0.160295
NCAPD2	9918	12	12p13.31	6473561	10.5157	4.05972
GAPDH	2597	12	12p13.31	6513918	7.05315	1.90757
NOL1	4839	12	12p13.31	6536298	5.21349	3.52307
ZNF384	171017	12	12p13.31	6645904	7.18086	1.82653
CD4	920	12	12p13.31	6768912	-9.87135	0.321472
CDCA3	83461	12	12p13.31	6828253	6.34532	4.32771
LOC283345	283345	12	12p13.31	6863440	6.33343	1.88014
C1R	715	12	12p13.31	7057768	-7.18329	0.257603
CD163	9332	12	12p13.31	7514676	-12.3163	0.127204
C3AR1	719	12	12p13.31	8102186	-11.0723	0.21569
CLEC4A	50856	12	12p13.31	8167495	-5.63715	0.47711
A2ML1	144568	12	12p13.31	8866417	-7.75147	0.040194
A2M	2	12	12p13.31	9111571	-36.2053	0.0236384
CLEC2D	29121	12	12p13.31	9713576	-8.50573	0.214351
CD69	969	12	12p13.31	9796349	-10.3664	0.0938884
CLEC2B	9976	12	12p13.31	9896235	-15.3391	0.155169
CLEC1A	51267	12	12p13.2	10114347	-7.56133	0.347113
CLEC7A	64581	12	12p13.2	10160643	-6.4939	0.435159
KLRK1	22914	12	12p13.2	10416219	-5.81317	0.187834
KLRC4	8302	12	12p13.2	10451250	-5.81317	0.187834
GPRC5A	9052	12	12p13.1	12935223	8.40661	6.3484
HEBP1	50865	12	12p13.1	13019065	5.15861	1.70367
FLJ22662	79887	12	12p13.1	14547864	-5.51054	0.122691
MGP	4256	12	12p12.3	14926094	-10.348	0.0259675
ARHGDIB	397	12	12p12.3	14986217	-5.68759	0.148043
EPS8	2059	12	12p12.3	15664342	-7.77219	0.169698
MGST1	4257	12	12p12.3	16391343	9.11369	3.75668
LMO3	55885	12	12p12.3	16592574	-7.52801	0.275778
RERGL	79785	12	12p12.3	18125070	-5.45289	0.628796
PLEKHA5	54477	12	12p12.3	19173995	-8.24096	0.243608
KCNJ8	3764	12	12p12.1	21809156	-6.74662	0.483589
ABCC9	10060	12	12p12.1	21841590	-15.094	0.125165
ST8SIA1	6489	12	12p12.1	22245200	-7.38099	0.442201
SOX5	6660	12	12p12.1	23576498	-16.5934	0.205715
LRMP	4033	12	12p12.1	25096508	-5.72	0.369269
BHLHB3	79365	12	12p12.1	26164226	-5.49663	0.221844
SSPN	8082	12	12p12.1	26239789	-10.7325	0.202344
MLSTD1	55711	12	12p11.22	29267865	-8.39026	0.41839
FAM60A	58516	12	12p11.21	31324785	6.4818	2.48705
MGC50559	254013	12	12p11.21	31703388	-6.9708	0.430917
AMN1	196394	12	12p11.21	31715338	-6.9708	0.430917
C12orf35	55196	12	12p11.21	32003620	-10.2253	0.109487
FGD4	121512	12	12p11.21	32546361	-5.98406	0.406792
ABCD2	225	12	12q12	38232813	-10.2894	0.155418
SLC2A13	114134	12	12q12	38435090	-6.28856	0.346608
LRRK2	120892	12	12q12	38905081	-15.5059	0.110538
CNTN1	1272	12	12q12	39372625	-12.6137	0.122402
PRICKLE1	144165	12	12q12	41139341	-12.5965	0.217116
NELL2	4753	12	12q12	43188332	-10.9447	0.137166
RACGAP1P	83956	12	12q12	43742568	9.92572	3.03074
FLJ20489	55652	12	12q13.11	46453258	5.12397	1.67594
TMEM106C	79022	12	12q13.11	46644259	6.4264	3.18434
TUBA1A	7846	12	12q13.12	47864849	-5.44241	0.352975
TROAP	10024	12	12q13.12	48003238	6.70427	3.22774
RACGAP1	29127	12	12q13.13	48669212	8.53086	3.9351
SMARCD1	6602	12	12q13.13	48765250	6.52532	2.1317
BIN2	51411	12	12q13.13	49961089	-7.19367	0.421791
SCN8A	6334	12	12q13.13	50271287	6.51531	2.57894
ACVRL1	94	12	12q13.13	50587469	-9.14133	0.395419
C12orf44	60673	12	12q13.13	50750025	6.03076	2.3573
KRT7	3855	12	12q13.13	50913221	6.82212	7.98084
KRT6B	3854	12	12q13.13	51126702	-10.2796	0.0314104
KRT6C	286887	12	12q13.13	51148567	-10.9483	0.0377481
KRT6A	3853	12	12q13.13	51167225	-11.3032	0.0291308
KRT1	3848	12	12q13.13	51354787	-5.40249	0.0815519
KRT4	3851	12	12q13.13	51486600	-6.56799	0.0464976
KRT8	3856	12	12q13.13	51577238	6.15064	4.63185
KRT18	3875	12	12q13.13	51628922	7.42805	3.0879
ITGB7	3695	12	12q13.13	51871374	-8.7823	0.495606
MAP3K12	7786	12	12q13.13	52160547	-5.56426	0.566238
NPFF	8620	12	12q13.13	52186741	-6.16464	0.494505
CALCOCO1	57658	12	12q13.13	52391169	-5.99121	0.493084
HOXC13	3229	12	12q13.13	52618843	11.6981	3.8276
HOXC10	3226	12	12q13.13	52665213	5.65242	4.47894
HOXC9	3225	12	12q13.13	52680144	7.64194	2.33579
HOXC8	3224	12	12q13.13	52689157	5.65328	1.67628
HOXC5	3222	12	12q13.13	52696909	5.15191	1.5336
ITGA5	3678	12	12q13.13	53075312	7.31581	2.1659
NCKAP1L	3071	12	12q13.2	53177762	-12.4959	0.156323
LOC440104	440104	12	12q13.2	54509658	-6.58548	0.49407
MMP19	4327	12	12q13.2	54515481	-6.05135	0.484933
CDK2	1017	12	12q13.2	54646826	11.216	4.64992
RPL41	6171	12	12q13.2	54796641	-9.99881	0.473867
COQ10A	93058	12	12q13.2	54946909	5.47021	1.91436
STAT2	6773	12	12q13.2	55021648	-6.22828	0.506863
TIMELESS	8914	12	12q13.2	55097174	9.17248	4.68158
PRIM1	5557	12	12q13.3	55411631	5.9746	2.53351
LRP1	4035	12	12q13.3	55808549	-13.8536	0.281015
SHMT2	6472	12	12q13.3	55909819	5.60298	3.06378
MARS	4141	12	12q13.3	56168118	6.49975	2.11121
DCTN2	10540	12	12q13.3	56210361	7.11716	1.84353
GEFT	115557	12	12q13.3	56291485	-6.70754	0.402832
SLC26A10	65012	12	12q14.1	56299960	-6.70754	0.402832
CYP27B1	1594	12	12q14.1	56442384	6.81901	2.39132
LRIG3	121227	12	12q14.1	57552204	-9.55959	0.354028
FAM19A2	338811	12	12q14.1	60388307	-6.88251	0.374952
AVPR1A	552	12	12q14.2	61826483	-7.15037	0.404416
TMBIM4	51643	12	12q14.3	64816984	-6.96013	0.285637
LOC100133322	100133322	12	12q14.3	64823241	-6.96013	0.285637
IRAK3	11213	12	12q14.3	64869284	-8.45708	0.109831
LYZ	4069	12	12q15	68028431	-21.6013	0.026898
PTPRB	5787	12	12q15	69196897	-6.81185	0.359704
LOC283392	283392	12	12q21.1	70942594	-14.084	0.157535
TRHDE	29953	12	12q21.1	70952730	-14.084	0.157535
CAPS2	84698	12	12q21.1	73957276	-6.96489	0.566721
GLIPR1	11010	12	12q21.2	74160780	-6.76609	0.141041
KRR1	11103	12	12q21.2	74177686	-6.76609	0.141041
E2F7	144455	12	12q21.2	75939157	9.03533	4.60822
ACSS3	79611	12	12q21.31	79995940	-18.6604	0.0933936
PPFIA2	8499	12	12q21.31	80177487	-8.00104	0.438086
C12orf26	84190	12	12q21.31	81276455	-6.90385	0.329725
TMTC2	160335	12	12q21.31	81605065	-6.37331	0.351441
DCN	1634	12	12q21.33	90063166	-6.36265	0.0210318
PLXNC1	10154	12	12q22	93066630	-13.0816	0.197263
SLC25A3	5250	12	12q23.1	97511534	7.98555	1.64416
GAS2L3	283431	12	12q23.1	99491620	7.47895	3.76891
TMEM16D	121601	12	12q23.1	99712716	-6.88211	0.194269
IGF1	3479	12	12q23.2	101313806	-12.0993	0.0747485
HCFC2	29915	12	12q23.3	102982457	-6.04411	0.318817
TXNRD1	7296	12	12q23.3	103133689	9.4978	4.35779
ALDH1L2	160428	12	12q23.3	103942332	-11.2012	0.220301
APPL2	55198	12	12q23.3	104091205	-6.03608	0.553702
BTBD11	121551	12	12q23.3	106236327	-11.3403	0.25549
CMKLR1	1240	12	12q23.3	107209477	-7.44375	0.500383
TMEM119	338773	12	12q24.11	107507756	-6.03224	0.533839
UNG	7374	12	12q24.11	108019798	5.4809	2.25907
ACACB	32	12	12q24.11	108061585	-6.22163	0.402531
ATPBD1C	51184	12	12q24.11	109374674	5.07913	1.91306
C12orf24	29902	12	12q24.11	109390615	5.07913	1.91306
HVCN1	84329	12	12q24.11	109570874	-7.00348	0.519013
C12orf51	283450	12	12q24.13	111082494	-6.94247	0.453919
MED13L	23389	12	12q24.21	114880764	-5.62125	0.404875
TMEM118	84900	12	12q24.22	115660479	11.0432	2.71443
RFC5	5985	12	12q24.23	116938893	8.95667	2.7118
NME2P1	283458	12	12q24.31	119204323	5.83592	2.56919
GATC	283459	12	12q24.31	119368667	5.67242	1.83994
P2RX7	5027	12	12q24.31	120055061	-8.65925	0.412918
ORAI1	84876	12	12q24.31	120548858	6.50919	2.1399
RHOF	54509	12	12q24.31	120700043	10.8539	5.19743
B3GNT4	79369	12	12q24.31	121254181	5.55675	1.54085
GPR109B	8843	12	12q24.31	121765256	-5.84483	0.351747
ABCB9	23457	12	12q24.31	121979492	6.46879	1.85462
SCARB1	949	12	12q24.31	123828127	5.50181	3.45891
TMEM132C	92293	12	12q24.32	127556582	-5.51465	0.381128
GPR133	283383	12	12q24.33	130004790	-5.61061	0.385693
SNORA49	677829	12	12q24.33	131081722	-7.74272	0.215045
NOC4L	79050	12	12q24.33	131194946	5.08508	2.49777
POLE	5426	12	12q24.33	131710421	6.39851	2.64115
PXMP2	5827	12	12q24.33	131774265	5.72377	1.98362
PGAM5	192111	12	12q24.33	131797509	6.32408	1.9765
KIAA0692	23141	12	12q24.33	131812327	6.63859	1.84408
GJB2	2706	13	13q12.11	19659605	-6.30455	0.083258
GJB6	10804	13	13q12.11	19694101	-7.54094	0.0465871
IFT88	8100	13	13q12.11	20039208	-5.38493	0.344146
LATS2	26524	13	13q12.11	20445175	6.19163	1.64428
C13orf3	221150	13	13q12.11	20625734	5.38744	3.42354
MRP63	78988	13	13q12.11	20648372	5.38744	3.42354
FGF9	2254	13	13q12.11	21143875	-5.93521	0.258268
PAN3	255967	13	13q12.2	27646417	-6.22023	0.34898
FLT1	2321	13	13q12.2	27774389	-16.7567	0.192522
SLC46A3	283537	13	13q12.3	28172217	-9.09983	0.134547
UBL3	5412	13	13q12.3	29236542	-5.40702	0.415382
KATNAL1	84056	13	13q12.3	29674767	-7.03861	0.391586
ALOX5AP	241	13	13q12.3	30207669	-12.5733	0.310264
CG018	90634	13	13q13.1	31872860	-6.36952	0.410785
PFAAP5	10443	13	13q13.1	31904930	-7.62634	0.204216
KL	9365	13	13q13.1	32488571	-6.21769	0.550746
DCLK1	9201	13	13q13.3	35243478	-13.0115	0.191798
POSTN	10631	13	13q13.3	37034779	-11.7401	0.177428
NHLRC3	387921	13	13q13.3	38510455	-6.20995	0.399862
LHFP	10186	13	13q13.3	38815029	-7.4893	0.275483
C13orf15	28984	13	13q14.11	40929542	-7.23029	0.206633
KIAA0564	23078	13	13q14.11	41038961	-6.69522	0.397968
DGKH	160851	13	13q14.11	41520889	-6.51614	0.411841
EPSTI1	94240	13	13q14.11	42360122	-7.0501	0.345444
TPT1	7178	13	13q14.12	44809304	-12.141	0.380043
LCP1	3936	13	13q14.12	45598060	-15.7592	0.0547144
C13orf18	80183	13	13q14.12	45814137	-11.771	0.302169
ESD	2098	13	13q14.2	46243392	-6.44433	0.320129
ITM2B	9445	13	13q14.2	47705309	-6.17771	0.371607
P2RY5	10161	13	13q14.2	47883182	-28.2229	0.0248001
RCBTB2	1102	13	13q14.2	47961100	-12.4699	0.204993
EBPL	84650	13	13q14.3	49132863	-8.19678	0.415158
TRIM13	10206	13	13q14.3	49469144	-9.01765	0.353441
KCNRG	283518	13	13q14.3	49487391	-9.01765	0.353441
RNASEH2B	79621	13	13q14.3	50381928	-7.01623	0.564755
VPS36	51028	13	13q14.3	51884738	-5.84878	0.267817
LOC121981	121981	13	13q21.1	52292633	5.55261	1.74816
DIAPH3	81624	13	13q21.2	59137718	8.52989	7.42026
DACH1	1602	13	13q21.33	70910099	-11.61	0.208994
TBC1D4	9882	13	13q22.2	74756810	-5.52963	0.591309
KCTD12	115207	13	13q22.3	76352305	-5.43706	0.566056
SCEL	8796	13	13q22.3	77007860	-7.18241	0.0368944
SLAIN1	122060	13	13q22.3	77170471	-6.24306	0.362779
SLITRK6	84189	13	13q31.1	85264923	-5.96372	0.529421
MIRN622	693207	13	13q31.3	89681436	8.12112	6.27612
SLC15A1	6564	13	13q32.3	98134057	-6.44914	0.451291
DOCK9	23348	13	13q32.3	98243745	-7.96547	0.317896
LOC100132099	100132099	13	13q32.3	98699124	-5.78532	0.372741
EBI2	1880	13	13q32.3	98744790	-8.00883	0.310788
CLYBL	171425	13	13q32.3	99056937	-7.15447	0.622509
ZIC5	85416	13	13q32.3	99413276	6.15924	1.9985
PCCA	5095	13	13q32.3	99539338	-7.22415	0.353506
ITGBL1	9358	13	13q33.1	100902967	-10.7884	0.254498
KDELC1	79070	13	13q33.1	102234632	5.87135	2.51342
EFNB2	1948	13	13q33.3	105940094	-8.08848	0.235539
TNFSF13B	10673	13	13q33.3	107719978	-6.38562	0.578999
F10	2159	13	13q34	112825114	-6.76554	0.415542
ADPRHL1	113622	13	13q34	113124261	5.37407	1.61396
FLJ39632	642477	14	14q11.1	18957179	5.62056	1.97215
TEP1	7011	14	14q11.2	19905766	-6.32362	0.592374
NP	4860	14	14q11.2	20007382	5.84045	2.49491
RNASE6	6039	14	14q11.2	20319050	-11.7004	0.229656
RNASE1	6035	14	14q11.2	20339355	-16.9902	0.0940338
NDRG2	57447	14	14q11.2	20554762	-15.161	0.121217
SNORD8	319103	14	14q11.2	20935292	-7.74957	0.277081
SLC7A7	9056	14	14q11.2	22312274	-10.1059	0.469369
MMP14	4323	14	14q11.2	22375633	-6.2477	0.260946
JUB	84962	14	14q11.2	22510249	9.15713	2.65289
PSMB5	5693	14	14q11.2	22564900	5.32622	2.49072
CDH24	64403	14	14q11.2	22586709	5.36015	1.69748
SLC7A8	23428	14	14q11.2	22664344	-10.69	0.213936
EFS	10278	14	14q11.2	22895451	-7.65913	0.49445
C14orf122	51016	14	14q12	23678014	6.47568	2.20808
ADCY4	196883	14	14q12	23857410	-9.81944	0.395229
RIPK3	11035	14	14q12	23875067	-8.43128	0.505295
NFATC4	4776	14	14q12	23907094	-8.3814	0.449185
KIAA1305	57523	14	14q12	23937832	-7.74319	0.362483
NOVA1	4857	14	14q12	25984929	-12.3129	0.211359
NKX2-1	7080	14	14q13.3	36055353	6.03676	1.69131
LRFN5	145581	14	14q21.2	41147090	-11.7854	0.232449
C14orf28	122525	14	14q21.3	44436257	-9.34871	0.297643
KLHDC1	122773	14	14q22.1	49229635	-14.2512	0.121175
GNG2	54331	14	14q22.1	51396800	-9.03765	0.38538
NID2	22795	14	14q22.1	51541270	-13.2975	0.260373
PTGER2	5732	14	14q22.1	51850863	-5.69367	0.146712
CDKN3	1033	14	14q22.2	53933476	8.39678	6.27494
DLG7	9787	14	14q22.3	54684601	5.4253	5.57019
PELI2	57161	14	14q23.1	55654846	-7.71227	0.409415
RHOJ	57381	14	14q23.2	62740898	-14.4247	0.140504
ACTN1	87	14	14q24.1	68410793	7.48102	2.37064
LOC100130174	100130174	14	14q24.1	69107969	5.08987	1.75869
KIAA0247	9766	14	14q24.1	69148066	-6.82753	0.455203
SFRS5	6430	14	14q24.2	69303582	-6.10815	0.344656
LIN52	91750	14	14q24.3	73621252	5.41384	1.79514
LTBP2	4053	14	14q24.3	74034639	-7.4517	0.381872
EIF2B2	8892	14	14q24.3	74539365	5.60144	1.6913
VASH1	22846	14	14q24.3	76298285	-5.78201	0.625192
DIO2	1734	14	14q31.1	79733622	-9.29952	0.0656589
FLRT2	23768	14	14q31.3	85066241	-17.2183	0.123445
GPR65	8477	14	14q31.3	87541249	-7.94471	0.412001
C14orf159	80017	14	14q32.12	90650110	-8.19367	0.323286
TC2N	123036	14	14q32.12	91316279	-6.75886	0.194655
FBLN5	10516	14	14q32.12	91405508	-5.43647	0.320489
IFI27	3429	14	14q32.13	93646832	-7.2202	0.241441
FAM14A	83982	14	14q32.13	93663871	-6.26967	0.528837
DICER1	23405	14	14q32.13	94622319	-6.43301	0.305714
BDKRB2	624	14	14q32.2	95740950	-8.2314	0.330477
MEG3	55384	14	14q32.2	100362198	-9.57851	0.276225
SNORD113-3	767563	14	14q32.31	100466009	-14.4781	0.118641
SNORD113-4	767564	14	14q32.31	100472581	-17.1384	0.06183
SNORD114-2	767578	14	14q32.31	100487946	-11.4719	0.104208
SNORD114-3	767579	14	14q32.31	100489439	-13.4581	0.137306
MIRN487A	619555	14	14q32.31	100588535	-5.44958	0.634454
DIO3	1735	14	14q32.31	101097441	-5.69497	0.338102
ANKRD9	122416	14	14q32.31	102042951	5.83713	1.70024
XRCC3	7517	14	14q32.33	103233707	8.0542	2.18672
INF2	64423	14	14q32.33	104226988	5.58366	1.94196
CDCA4	55038	14	14q32.33	104547318	5.96007	3.00488
[truncated: 1,126 more rows]
